# Supplementary material for: A Bibliometric Analysis on Smart Cities Related to Land Use
Source: MDPI journal article supplement (doi:10.3390/land11122132), 2022-11-26
Supplement: s1 [file s1]

**Table S6.** Example of VOSviewer thesaurus file Expansion Period.

|    | <b>LABEL</b>             | <b>REPLACE BY</b>     |
|----|--------------------------|-----------------------|
| 1  | bibliometric analytics   | bibliometric analysis |
| 2  | city indicators          | city dashboards       |
| 3  | Coronavirus              | covid-19              |
| 4  | development trajectories | development paths     |
| 5  | Guidelines               | Guide                 |
| 6  | Laboratories             | Labs                  |
| 7  | local government         | local governance      |
| 8  | public transportation    | public transport      |
| 9  | swot analysis            | swot                  |
| 10 | Telework                 | teleworking           |
