# Supplementary material for: A Bibliometric Analysis on Smart Cities Related to Land Use
Source: MDPI journal article supplement (doi:10.3390/land11122132), 2022-11-26
Supplement: s1 [file s1]

**Table S3.** The most frequent keywords.

|    | <b>Keyword</b>                                   | <b>Occurrences</b> | <b>Total link strength</b> |
|----|--------------------------------------------------|--------------------|----------------------------|
| 1  | smart city                                       | 77                 | 96                         |
| 2  | City                                             | 25                 | 54                         |
| 3  | governance                                       | 10                 | 26                         |
| 4  | innovation                                       | 9                  | 23                         |
| 5  | knowledge                                        | 7                  | 19                         |
| 6  | systems                                          | 6                  | 17                         |
| 7  | technology                                       | 6                  | 17                         |
| 8  | urban development                                | 6                  | 16                         |
| 9  | information                                      | 5                  | 14                         |
| 10 | framework                                        | 6                  | 13                         |
| 11 | urban planning                                   | 7                  | 13                         |
| 12 | information and communication technologies (itc) | 5                  | 11                         |
| 13 | sustainability                                   | 6                  | 11                         |
