# Supplementary material for: A Bibliometric Analysis on Smart Cities Related to Land Use
Source: MDPI journal article supplement (doi:10.3390/land11122132), 2022-11-26
Supplement: s1 [file s1]

| Document                                                                                                                                         | Author                                                                                                      | DOI                            |
|--------------------------------------------------------------------------------------------------------------------------------------------------|-------------------------------------------------------------------------------------------------------------|--------------------------------|
| 1 - Smart Cities: Definitions, Dimensions, Performance, and Initiatives                                                                          | Albino, V<br>Berardi, U<br>Dangelico, RM                                                                    | 10.1080/10630732.2014.942092   |
| 2 - Current trends in Smart City initiatives: Some stylised facts                                                                                | Neirotti, P<br>De Marco, A<br>Cagliano, AC<br>Mangano, G<br>Scorrano, F                                     | 10.1016/j.cities.2013.12.010   |
| 3 - What are the differences between sustainable and smart cities?                                                                               | Ahvenniemi, H<br>Huovila, A<br>Pinto-Seppa, I<br>Airaksinen, M                                              | 10.1016/j.cities.2016.09.009   |
| 4 - Smart city policies: A spatial approach                                                                                                      | Angelidou, M                                                                                                | 10.1016/j.cities.2014.06.007   |
| 5 - Towards an effective framework for building smart cities: Lessons from Seoul and San Francisco                                               | Lee, JH<br>Hancock, MG<br>Hu, MC                                                                            | 10.1016/j.techfore.2013.08.033 |
| 6 - Smart cities: A conjuncture of four forces                                                                                                   | Angelidou, M                                                                                                | 10.1016/j.cities.2015.05.004   |
| 7 - An integrated service-device-technology roadmap for smart city development                                                                   | Lee, JH<br>Phaal, R<br>Lee, SH                                                                              | 10.1016/j.techfore.2012.09.020 |
| 8 - On big data, artificial intelligence and smart cities                                                                                        | Allam, Z<br>Dhunni, ZA                                                                                      | 10.1016/j.cities.2019.01.032   |
| 9 - The First Two Decades of Smart-City Research: A Bibliometric Analysis                                                                        | Mora, L<br>Bolici, R<br>Deakin, M                                                                           | 10.1080/10630732.2017.1285123  |
| 10 - How do we understand smart cities? An evolutionary perspective                                                                              | Kummitha, RKR<br>Crutzen, N                                                                                 | 10.1016/j.cities.2017.04.010   |
| 11 - Lessons in urban monitoring taken from sustainable and livable cities to better address the Smart Cities initiative                         | Marsal-Llacuna, ML<br>Colomer-Llinas, J<br>Melendez-Frigola, J                                              | 10.1016/j.techfore.2014.01.012 |
| 12 - Understanding 'smart cities': Intertwining development drivers with desired outcomes in a multidimensional framework                        | Yigitcanlar, T<br>Kamruzzaman, M<br>Buys, L<br>Ioppolo, G<br>Sabatini-Marques, J<br>da Costa, EM<br>Yun, JJ | 10.1016/j.cities.2018.04.003   |
| 13 - The governance of smart cities: A systematic literature review                                                                              | Ruhlandt, RWS                                                                                               | 10.1016/j.cities.2018.02.014   |
| 14 - How to strategize smart cities: Revealing the SMART model                                                                                   | Ben Letaifa, S                                                                                              | 10.1016/j.jbusres.2015.01.024  |
| 15 - The management of organizational ambidexterity through alliances in a new context of analysis: Internet of Things (IoT) smart city projects | Bresciani, S<br>Ferraris, A<br>Del Giudice, M                                                               | 10.1016/j.techfore.2017.03.002 |
| 16 - Smart cities with big data: Reference models, challenges, and considerations                                                                | Lim, C<br>Kim, KJ<br>Maglio, PP                                                                             | 10.1016/j.cities.2018.04.011   |

|                                                                                                                                  |                                                                       |                                |
|----------------------------------------------------------------------------------------------------------------------------------|-----------------------------------------------------------------------|--------------------------------|
| 17 - Internet of Things Applications and challenges in smart cities: a case study of IBM smart city projects                     | Sucotto, V<br>Ferraris, A<br>Bresciani, S                             | 10.1108/BPMJ-05-2015-0074      |
| 18 - Understanding Smart Cities: Innovation ecosystems, technological advancements, and societal challenges                      | Appio, FP<br>Lima, M<br>Paroutis, S                                   | 10.1016/j.techfore.2018.12.018 |
| 19 - The Role of Smart City Characteristics in the Plans of Fifteen Cities                                                       | Angelidou, M                                                          | 10.1080/10630732.2017.1348880  |
| 20 - Smart utopia VS smart reality: Learning by experience from 10 smart city cases                                              | Anthopoulos, L                                                        | 10.1016/j.cities.2016.10.005   |
| 21 - Smart and sustainable? Five tensions in the visions and practices of the smart-sustainable city in Europe and North America | Martin, CJ<br>Evans, J<br>Karvonen, A                                 | 10.1016/j.techfore.2018.01.005 |
| 22 - Smart City implementation and discourses: An integrated conceptual model. The case of Vienna                                | Fernandez-Anez, V<br>Fernandez-Guell, JM<br>Giffinger, R              | 10.1016/j.cities.2017.12.004   |
| 23 - Smart innovative cities: The impact of Smart City policies on urban innovation                                              | Caragliu, A<br>Del Bo, CF                                             | 10.1016/j.techfore.2018.07.022 |
| 24 - Smart cities: Utopia or neoliberal ideology?                                                                                | Grossi, G<br>Pianezzi, D                                              | 10.1016/j.cities.2017.07.012   |
| 25 - A strategic view on smart city technology: The case of IBM Smarter Cities during a recession                                | Paroutis, S<br>Bennett, M<br>Heradeous, L                             | 10.1016/j.techfore.2013.08.041 |
| 26 - A methodological framework for benchmarking smart transport cities                                                          | Debnath, AK<br>Chin, HC<br>Haque, MM<br>Yuen, B                       | 10.1016/j.cities.2013.11.004   |
| 27 - Rescaling and refocusing smart cities research: from mega cities to smart villages                                          | Visvizi, A<br>Lytras, MD                                              | 10.1108/JSTPM-02-2018-0020     |
| 28 - Unplugging: Deconstructing the Smart City                                                                                   | Calzada, I<br>Cobo, C                                                 | 10.1080/10630732.2014.971535   |
| 29 - Unmanned aerial vehicles applications in future smart cities                                                                | Mohamed, N<br>Al-Jaroodi, J<br>Jawahar, I<br>Idries, A<br>Mohammed, F | 10.1016/j.techfore.2018.05.004 |
| 30 - E-health and wellbeing monitoring using smart healthcare devices: An empirical investigation                                | Papa, A<br>Mital, M<br>Pisano, P<br>Del Giudice, M                    | 10.1016/j.techfore.2018.02.018 |
| 31 - Towards the 'ubiquitous eco-city': An analysis of the internationalisation of eco-city policy and practice                  | Joss, S<br>Cowley, R<br>Tomozeiu, D                                   | 10.1080/17535069.2012.762216   |
| 32 - The Smart City as Global Discourse: Storylines and Critical Junctures across 27 Cities                                      | Joss, S<br>Sengers, F<br>Schraven, D<br>Caprotti, F<br>Dayot, Y       | 10.1080/10630732.2018.1558387  |
| 33 - Tools and Technologies for Planning the Development of Smart Cities                                                         | Stratigea, A<br>Papadopoulou, CA<br>Panagiotopoulou, M                | 10.1080/10630732.2015.1018725  |

|                                                                                                                                      |                                                                                             |                                |
|--------------------------------------------------------------------------------------------------------------------------------------|---------------------------------------------------------------------------------------------|--------------------------------|
| 34 - Smart city or smart citizens? The Barcelona case                                                                                | Capdevila, I<br>Zarlenga, MI                                                                | 10.1108/JSMA-03-2015-0030      |
| 35 - Enhancing sustainable urban development through smart city applications                                                         | Angelidou, M<br>Psaltoglou, A<br>Komninos, N<br>Kalderi, C<br>Tsarchopoulos, P<br>Panori, A | 10.1108/JSTPM-05-2017-0016     |
| 36 - Strategic principles for smart city development: A multiple case study analysis of European best practices                      | Morak L<br>Deakin, M<br>Reid, A                                                             | 10.1016/j.techfore.2018.07.035 |
| 37 - The smart city and its publics: insights from across six UK cities                                                              | Cowley, R<br>Dayot, Y<br>Joss, S                                                            | 10.1080/17535069.2017.1293150  |
| 38 - Smart City and information technology: A review                                                                                 | Camero, A<br>Alba, E                                                                        | 10.1016/j.cities.2019.04.014   |
| 39 - Smart Cities: Towards a New Citizenship Regime? A Discourse Analysis of the British Smart City Standard                         | Joss, S<br>Cook, M<br>Dayot, Y                                                              | 10.1080/10630732.2017.1336027  |
| 40 - Smart cities: an effective urban development and management model?                                                              | Yigitcanlar, T                                                                              | 10.1080/07293682.2015.1019752  |
| 41 - Adoption of Internet of Things in India: A test of competing models using a structured equation modeling approach               | Mital, M<br>Chang, V<br>Choudhary, P<br>Papa, A<br>Pani, AK                                 | 10.1016/j.techfore.2017.03.001 |
| 42 - Trajectory of urban sustainability concepts: A 35-year bibliometric analysis                                                    | Fu, Y<br>Zhang, XL                                                                          | 10.1016/j.cities.2016.08.003   |
| 43 - Implementing citizen centric technology in developing smart cities: A model for predicting the acceptance of urban technologies | Sepasgozar, SME<br>Hawken, S<br>Sargolzaei, S<br>Foroozanfa, M                              | 10.1016/j.techfore.2018.09.012 |
| 44 - A Smart City Is a Collaborative Community: Lessons from Smart Aarhus                                                            | Snow, CC<br>Hakonsson, DD<br>Obel, B                                                        | 10.1177/0008125616683954       |
| 45 - Towards a critique of cybernetic urbanism: The smart city and the society of control                                            | Krivy, M                                                                                    | 10.1177/1473095216645631       |
| 46 - A model for the analysis of data-driven innovation and value generation in smart cities' ecosystems                             | Abella, A<br>Ortiz-De-Urbina-Criado, M<br>De-Pablos-Heredero, C                             | 10.1016/j.cities.2017.01.011   |
| 47 - The role of universities in the knowledge management of smart city projects                                                     | Ardito, L<br>Ferraris, A<br>Petruzzelli, AM<br>Bresciani, S<br>Del Giudice, M               | 10.1016/j.techfore.2018.07.030 |
| 48 - Ambidextrous work in smart city project alliances: unpacking the role of human resource management systems                      | Ferraris, A<br>Bresciani, S<br>Erhardt, N                                                   | 10.1080/09585192.2017.1291530  |

|                                                                                                                                          |                                                                                           |                                |
|------------------------------------------------------------------------------------------------------------------------------------------|-------------------------------------------------------------------------------------------|--------------------------------|
| 49 - Towards the smart city 2.0: Empirical evidence of using smartness as a tool for tackling social challenges                          | Trencher, G                                                                               | 10.1016/j.techfore.2018.07.033 |
| 50 - Future living framework: Is blockchain the next enabling network?                                                                   | Marsal-Llacuna, ML                                                                        | 10.1016/j.techfore.2017.12.005 |
| 51 - Cagliari and smart urban mobility: Analysis and comparison                                                                          | Garau, C<br>Masala, F<br>Pinna, F                                                         | 10.1016/j.cities.2016.02.012   |
| 52 - Towards Post-Anthropocentric Cities: Reconceptualizing Smart Cities to Evade Urban Ecocide                                          | Yigitcanlar, T<br>Foth, M<br>Kamruzzaman, M                                               | 10.1080/10630732.2018.1524249  |
| 53 - Smart City Pilot Projects: Exploring the Dimensions and Conditions of Scaling Up                                                    | Van Winden, W<br>Van den Buuse, D                                                         | 10.1080/10630732.2017.1348884  |
| 54 - Smart city intellectual capital: an emerging view of territorial systems innovation management                                      | Dameri, RP<br>Ricciardi, F                                                                | 10.1108/JIC-02-2015-0018       |
| 55 - Achieving smart sustainable cities with GeoICT support: The Saudi evolving smart cities                                             | Aina, YA                                                                                  | 10.1016/j.cities.2017.07.007   |
| 56 - Combining co-citation clustering and text-based analysis to reveal the main development paths of smart cities                       | Mora, L<br>Deakin, M<br>Reid, A                                                           | 10.1016/j.techfore.2018.07.019 |
| 57 - Smart energy city development: A story told by urban planners                                                                       | Mosannenzadeh, F<br>Bisello, A<br>Vaccaro, R<br>D'Alonzo, V<br>Hunter, GW<br>Vettorato, D | 10.1016/j.cities.2017.02.001   |
| 58 - How Are Smart City Concepts and Technologies Perceived and Utilized? A Systematic Geo-Twitter Analysis of Smart Cities in Australia | Yigitcanlar, T<br>Kankanamge, N<br>Vella, K                                               | 10.1080/10630732.2020.1753483  |
| 59 - Big data analytics: Computational intelligence techniques and application areas                                                     | Iqbal, R<br>Doctor, F<br>More, B<br>Mahmud, S<br>Yousuf, U                                | 10.1016/j.techfore.2018.03.024 |
| 60 - Smart Cities and Mobility: Does the Smartness of Australian Cities Lead to Sustainable Commuting Patterns?                          | Yigitcanlar, T<br>Kamruzzaman, M                                                          | 10.1080/10630732.2018.1476794  |
| 61 - The image of the creative city, eight years later: Turin, urban branding and the economic crisis taboo                              | Vanolo, A                                                                                 | 10.1016/j.cities.2015.04.004   |
| 62 - Towards an urban planners' perspective on smart city                                                                                | Papa, R<br>Gargiulo, C<br>Galderisi, A                                                    | 10.6092/1970-9870/1536         |
| 63 - Smart and resilient cities A systemic approach for developing cross-sectoral strategies in the face of climate change               | Papa, R<br>Galderisi, A<br>Majello, MCV<br>Saretta, E                                     | 10.6092/1970-9870/2883         |
| 64 - The smart city as a common place for tourists and residents: A structural                                                           | Romao, J<br>Kourtiti, K                                                                   | 10.1016/j.cities.2017.11.007   |

|                                                                                                  |                                                                          |                                |
|--------------------------------------------------------------------------------------------------|--------------------------------------------------------------------------|--------------------------------|
| analysis of the determinants of urban attractiveness                                             | Neuts, B<br>Nijkamp, P                                                   |                                |
| 65 - Smarter than Smart: Rio de Janeiro's Flawed Emergence as a Smart City                       | Gaffney, C<br>Robertson, C                                               | 10.1080/10630732.2015.1102423  |
| 66 - Development and competition of digital service platforms: A system dynamics approach        | Ruutu, S<br>Casey, T<br>Kotovirta, V                                     | 10.1016/j.techfore.2016.12.011 |
| 67 - Moving towards smart cities: Solutions that lead to the Smart City Transformation Framework | Kumar, H<br>Singh, MK<br>Gupta, MP<br>Madaan, J                          | 10.1016/j.techfore.2018.04.024 |
| 68 - Municipalities' understanding of the Smart City concept: An exploratory analysis in Belgium | Desdemoustier, J<br>Crutzen, N<br>Giffinger, R                           | 10.1016/j.techfore.2018.10.029 |
| 69 - Defining smart city a conceptual framework based on keyword analysis                        | Mosannenzadeh, F<br>Vettorato, D                                         |                                |
| 70 - Individual entrepreneurial orientation and intrapreneurship in the public sector            | Kraus, S<br>Breier, M<br>Jones, P<br>Jughes, M                           | 10.1007/s11365-019-00593-6     |
| 71 - Risk management in sustainable smart cities governance: A TOE framework                     | Ullah, F<br>Qayyum, S<br>Thaheem, MJ<br>Al-Turjman, F<br>Sepasgozar, SME | 10.1016/j.techfore.2021.120743 |
| 72 - To the smart city and beyond? Developing a typology of smart urban innovation               | Nilssen, M                                                               | 10.1016/j.techfore.2018.07.060 |
| 73 - Smart home: Highly-educated students' acceptance                                            | Baudier, P<br>Amami, C<br>Deboeuf-Rouchon, M                             | 10.1016/j.techfore.2018.06.043 |
| 74 - Understanding smart cities as a global strategy: A comparison between Italy and China       | Dameri, RP<br>Benevolo, C<br>Veglianti, E<br>Li, YY                      | 10.1016/j.techfore.2018.07.025 |
| 75 - An investigation of IBM's Smarter Cites Challenge: What do participating cities want?       | Alizadeh, T                                                              | 10.1016/j.cities.2016.12.009   |
| 76 - Driving elements to make cities smarter: Evidences from European projects                   | Camboim, GF<br>Zawislak, PA<br>Pufal, NA                                 | 10.1016/j.techfore.2018.09.014 |
| 77 - Smarter cities in post-socialist country: Example of Poland                                 | Sikora-Fernandez, D                                                      | 10.1016/j.cities.2018.03.011   |
| 78 - The (In)Security of Smart Cities: Vulnerabilities, Risks, Mitigation, and Prevention        | Kitchin, R<br>Dodge, M                                                   | 10.1080/10630732.2017.1408002  |
| 79 - 'Smart' sustainable urban regeneration: Institutions, quality and financial innovation      | Huston, S<br>Rahimzard, R<br>Parsa, A                                    | 10.1016/j.cities.2015.05.005   |
| 80 - Smart cities, big data and urban policy: Towards urban analytics for the long run           | Kandt, J<br>Batty, M                                                     | 10.1016/j.cities.2020.102992   |

|                                                                                                                                                    |                                                                        |                                |
|----------------------------------------------------------------------------------------------------------------------------------------------------|------------------------------------------------------------------------|--------------------------------|
| 81 - Effects of successful adoption of information technology enabled services in proposed smart cities of India: From user experience perspective | Chatterjee, S<br>Kar, AK                                               | 10.1108/JSTPM-03-2017-0008     |
| 82 - Smart city communication via social media: Analysing residents' and visitors' engagement                                                      | Molinillo, S<br>Anaya-Sanchez, R<br>Morrison, AM<br>Coca-Stefaniak, JA | 10.1016/j.cities.2019.06.003   |
| 83 - The City as Living Laboratory: Empowering Citizens with the Citadel Toolkit                                                                   | Veeckman, C<br>Van der Graaf, S                                        |                                |
| 84 - An exploration of smart city approaches by international ICT firms                                                                            | Van den Buuse, D<br>Kolk, A                                            | 10.1016/j.techfore.2018.07.029 |
| 85 - Identifying the results of smart city development: Findings from systematic literature review                                                 | Lim, Y<br>Edelenbos, J<br>Gianoli, A                                   | 10.1016/j.cities.2019.102397   |
| 86 - An evaluation system based on the self-organizing system framework of smart cities: A case study of smart transportation systems in China     | Yan, JH<br>Liu, JP<br>Tseng, FM                                        | 10.1016/j.techfore.2018.07.009 |
| 87 - The alignment of University curricula with the building of a Smart City: A case study from Barcelona                                          | Grimaldi, D<br>Fernandez, V                                            | 10.1016/j.techfore.2016.03.011 |
| 88 - Irregular migratory flows Towards an ICTs' enabled integrated framework for resilient urban systems                                           | Visvizi, A<br>Mazzucelli, C<br>Lytras, M                               | 10.1108/JSTPM-05-2017-0020     |
| 89 - The Smart City as an opportunity for entrepreneurship                                                                                         | Kraus, S<br>Richter, C<br>Syrja, P                                     | 10.1504/IJEV.2015.071481       |
| 90 - Reframing technologically enhanced urban scenarios: A design research model towards human centered smart cities                               | Andreani, S<br>Kalchschmidt, M<br>Pinto, R<br>Sayegh, A                | 10.1016/j.techfore.2018.09.028 |
| 91 - Smart City Planning from an Evolutionary Perspective                                                                                          | Komninos, N<br>Kakderi, C<br>Panori, A<br>Tsarchopoulos, P             | 10.1080/10630732.2018.1485368  |
| 92 - Urban Technological Innovation: Developing and Testing a Sociotechnical Framework for Studying Smart City Projects                            | Meijer, A<br>Thaens, M                                                 | 10.1177/1078087416670274       |
| 93 - Impacts of low citizen awareness and usage in smart city services: the case of London's smart parking system                                  | Peng, GCA<br>Nunes, MB<br>Zheng, LQ                                    | 10.1007/s10257-016-0333-8      |
| 94 - The role of universities in the Smart City innovation: Multistakeholder integration and engagement perspectives                               | Ferraris, A<br>Belyaeva, Z<br>Bresciani, S                             | 10.1016/j.jbusres.2018.12.010  |
| 95 - Dynamic capabilities for ecosystem orchestration A capability-based framework for smart city innovation initiatives                           | Linde, L<br>Sjodin, D<br>Parida, V<br>Wincent, J                       | 10.1016/j.techfore.2021.120614 |
| 96 - Hyderabad: Visioning, restructuring and making of a high-tech city                                                                            | Das, D                                                                 | 10.1016/j.cities.2014.11.008   |

|                                                                                                                                |                                                                             |                                |
|--------------------------------------------------------------------------------------------------------------------------------|-----------------------------------------------------------------------------|--------------------------------|
| 97 - A digital twin smart city for citizen feedback                                                                            | White, G<br>Zink, A<br>Codeca, L<br>Clarke, S                               | 10.1016/j.cities.2020.103064   |
| 98 - Entrepreneurial urbanism and technological panacea: Why Smart City planning needs to go beyond corporate visioning?       | Kummitha, RKR                                                               | 10.1016/j.techfore.2018.07.010 |
| 99 - A conceptual framework for the alignment of infrastructure assets to citizen requirements within a Smart Cities framework | Heaton, J<br>Parlikad, AK                                                   | 10.1016/j.cities.2019.01.041   |
| 100 - From Design Fiction to Design Friction: Speculative and Participatory Design of Values-Embedded Urban Technology         | Forlano, L<br>Mathew, A                                                     | 10.1080/10630732.2014.971525   |
| 101 - Transition towards a tourist innovation model: The smart tourism destination Reality or territorial marketing?           | Sigalat-Signes, E<br>Calvo-Palomares, R<br>Roig-Merino, B<br>Garcia-Adan, I | 10.1016/j.jik.2019.06.002      |
| 102 - Smart Urban Metabolism: Towards a Real-Time Understanding of the Energy and Material Flows of a City and Its Citizens    | Shahrokni, H<br>Lazarevic, D<br>Brandt, N                                   | 10.1080/10630732.2014.954899   |
| 103 - Municipal WiFi and interactive displays: Appropriation of new technologies in public urban spaces                        | Yipuli, J<br>Suopajarvi, T<br>Ojala, T<br>Kostakos, V<br>Kukka, H           | 10.1016/j.techfore.2013.08.037 |
| 104 -Smart solutions shape for sustainable low-carbon future: A review on smart cities and industrial parks in China           | Wang, YP<br>Ren, H<br>Dong, L<br>Park, HS<br>Zhang, YP<br>Xu, YW            | 10.1016/j.techfore.2019.04.014 |
| 105 - The Intelligent Method (I) for making "smarter" city projects and plans                                                  | Marsal-Llacuna, ML<br>Segal, ME                                             | 10.1016/j.cities.2016.02.006   |
| 106 -Making Smart Regions Smarter: Smart Specialization and the Role of Universities in Regional Innovation Ecosystems         | Markkula, M<br>Kune, H                                                      |                                |
| 107 - Smart cities and entrepreneurship: An agenda for future research                                                         | Kummitha, RKR                                                               | 10.1016/j.techfore.2019.119763 |
| 108 - Participatory energy: Research, imaginaries and practices on people' contribute to energy systems in the smart city      | Corsini, F<br>Certoma, C<br>Dyer, M<br>Frey, M                              | 10.1016/j.techfore.2018.07.028 |
| 109 - Stakeholder e-involvement and participatory tourism planning: analysis of an Italian case study                          | Presenza, A<br>Micera, R<br>Splendiani, S<br>Del Chiappa, G                 | 10.1504/IJKBD.2014.065320      |
| 110 - Data-Driven Participation: Algorithms, Cities, Citizens, and Corporate Control                                           | Tenney, M<br>Sieber, R                                                      | 10.17645/up.v1i2.645           |

|                                                                                                                                        |                                                             |                                |
|----------------------------------------------------------------------------------------------------------------------------------------|-------------------------------------------------------------|--------------------------------|
| 111 - Shaking for innovation: The (re)building of a (smart) city in a post disaster environment                                        | Marek, L<br>Campbell, M<br>Bui, L                           | 10.1016/j.cities.2016.12.013   |
| 112 - HR practices for explorative and exploitative alliances in smart cities: Evidences from smart city managers' perspective         | Ferraris, A<br>Santoro, G<br>Bresciani, S<br>Carayannis, EG | 10.1108/MD-04-2017-0384        |
| 113 - A study on the correlation between technology innovation and the new-type urbanization in Shaanxi province                       | Shang, J<br>Wang, Z<br>Li, L<br>Chen, Y<br>Li, PF           | 10.1016/j.techfore.2018.04.029 |
| 114 - Investigating 'anywhere working' as a mechanism for alleviating traffic congestion in smart cities                               | Hopkins, JL<br>McKay, J                                     | 10.1016/j.techfore.2018.07.032 |
| 115 - An ethical framework for big data and smart cities                                                                               | Chang, V                                                    | 10.1016/j.techfore.2020.120559 |
| 116 - Cities as Collaborative Innovation Platforms                                                                                     | Tukiainen, T<br>Leminen, S<br>Westerlund, M                 |                                |
| 117 - Civic entrepreneurial ecosystems: Smart city emergence in Kansas City                                                            | Sarma, S<br>Sunny, SA                                       | 10.1016/j.bushor.2017.07.010   |
| 118 - A comprehensive view of intelligent transport systems for urban smart mobility                                                   | Mangiaracina, R<br>Perego, A<br>Salvadori, G<br>Tumino, A   | 10.1080/13675567.2016.1241220  |
| 119 - Innovative public-private partnership to support Smart City: the case of "Chaire REVES"                                          | Dupont, L<br>Morel, L<br>Guidat, C                          | 10.1108/JSMA-03-2015-0027      |
| 120 - "Openness" of public governments in smart cities: removing the barriers for innovation and entrepreneurship                      | Ferraris, A<br>Santoro, G<br>Pellicelli, AC                 | 10.1007/s11365-020-00651-4     |
| 121 - How to Overcome the Dichotomous Nature of Smart City Research: Proposed Methodology and Results of a Pilot Study                 | Mora, L<br>Deakin, M<br>Reid, A<br>Angelidou, M             | 10.1080/10630732.2018.1525265  |
| 122 - Navigating platform urbanism                                                                                                     | Van der Graaf, S<br>Ballon, P                               | 10.1016/j.techfore.2018.07.027 |
| 123 - Towards a service-dominant platform for public value co-creation in a smart city: Evidence from two metropolitan cities in China | Yu, J<br>Wen, YT<br>Jin, J<br>Zhang, Y                      | 10.1016/j.techfore.2018.11.017 |
| 124 - Economic and policy uncertainty in climate change mitigation: The London Smart City case scenario                                | Contreras, G<br>Platania, F                                 | 10.1016/j.techfore.2018.07.018 |
| 125 - Problematizing data-driven urban practices: Insights from five Dutch 'smart cities'                                              | Gunders, DJ<br>Varro, K                                     | 10.1016/j.cities.2019.05.004   |
| 126 - Shortcomings to smart city planning and development exploring patterns and relationships                                         | Angelidou, M                                                | 10.6092/1970-9870/4032         |



|                                                                                                                                   |                                                                                       |                                |
|-----------------------------------------------------------------------------------------------------------------------------------|---------------------------------------------------------------------------------------|--------------------------------|
| 127 - A Multiple-Attribute Decision Making-based approach for smart city rankings design                                          | Escolar, S<br>Villanueva, FJ<br>Santofimia, MJ<br>Vila, D<br>Del Toro, X<br>Lopez, JC | 10.1016/j.techfore.2018.07.024 |
| 128 - Towards Third-Generation Living Lab Networks in Cities                                                                      | Leminen, S<br>Westerlund, M<br>Rajahonka, M                                           | 10.22215/timreview/1118        |
| 129 - The optimal provision of information and communication technologies in smart cities                                         | Batabyal, AA<br>Beladi, H                                                             | 10.1016/j.techfore.2019.07.013 |
| 130 - Beyond defining the smart city meeting top-down and bottom-up approaches in the middle                                      | Breuer, J<br>Walravens, N<br>Ballon, P                                                |                                |
| 131 - Smart City strategies and new urban development policies in the Polish context                                              | Masik, G<br>Sagan, I<br>Scott, JW                                                     | 10.1016/j.cities.2020.102970   |
| 132 - Business model innovation for urban smartization                                                                            | Schiavone, F<br>Paolone, F<br>Mancini, D                                              | 10.1016/j.techfore.2018.10.028 |
| 133 - Functionality between the size and indicators of smart cities: A research challenge with policy implications                | Borsekova, K<br>Korony, S<br>Vanova, A<br>Vitalisova, K                               | 10.1016/j.cities.2018.03.010   |
| 134 - Scenario-based identification of key factors for smart cities development policies                                          | Sokolov, A<br>Veselitskaya, N<br>Carabias, V<br>Yildirim, O                           | 10.1016/j.techfore.2019.119729 |
| 135 - Research investigations on the use or non-use of hearing aids in the smart cities                                           | Chang, V<br>Wang, YY<br>Wills, G                                                      | 10.1016/j.techfore.2018.03.002 |
| 136 - Determinants for Value Cocreation and Collaborative Paths in Complex Service Systems: A Focus on (Smart) Cities             | Polese, F<br>Barile, S<br>Caputo, F<br>Carrubbo, L<br>Waletzky, L                     | 10.1287/serv.2018.0218         |
| 137 - Multidimensional sustainability benchmarking for smart megacities                                                           | Shmelev, SE<br>Shmeleva, IA                                                           | 10.1016/j.cities.2019.03.015   |
| 138 - Increasing smart city competitiveness and sustainability through managing structural capital                                | Matos, F<br>Vairinhos, VM<br>Dameri, RP<br>Durst, S                                   | 10.1108/JIC-12-2016-0141       |
| 139 - Factors influencing the consideration of Public-Private Partnerships (PPP) for smart city projects: Evidence from Hong Kong | Lam, PTI<br>Yang, WJ                                                                  | 10.1016/j.cities.2020.102606   |
| 140 - Business models for developing smart cities. A fuzzy set qualitative comparative analysis of an IoT platform                | Abbate, T<br>Cesaroni, F<br>Cinici, MC<br>Villari, M                                  | 10.1016/j.techfore.2018.07.031 |

|                                                                                                                                           |                                                                                        |                                |
|-------------------------------------------------------------------------------------------------------------------------------------------|----------------------------------------------------------------------------------------|--------------------------------|
| 141 - City approaches to smart city evaluation and reporting: case studies in the United Kingdom                                          | Caird, S                                                                               | 10.1080/17535069.2017.1317828  |
| 142 - Smart cities as a source for entrepreneurial opportunities: Evidence for Spain                                                      | Barba-Sanchez, V<br>Arias-Antunez, E<br>Orozco-Barbosa, L                              | 10.1016/j.techfore.2019.119713 |
| 143 - Towards intelligently-sustainable cities? From intelligent and knowledge city programmes to the achievement of urban sustainability | Morelli, VG<br>Weijnen, M<br>Van Bueren, E<br>Wenzler, I<br>De Reuver, M<br>Salvati, L | 10.6092/1970-9870/1496         |
| 144 - The Smart City and its Citizens: Governance and Citizen Participation in Amsterdam Smart City                                       | Capra, CF                                                                              | 10.4018/IJEPR.2016010102       |
| 145 - Potential pitfalls in the development of smart cities and mitigation measures: An exploratory study                                 | Lam, PTI<br>Ma, RQ                                                                     | 10.1016/j.cities.2018.11.014   |
| 146 - Big data and smart cities: a public sector organizational learning perspective                                                      | Okwechime, E<br>Duncan, P<br>Edgar, D                                                  | 10.1007/s10257-017-0344-0      |
| 147 - Cities and the politics of gamification                                                                                             | Vanolo, A                                                                              | 10.1016/j.cities.2017.12.021   |
| 148 - Unpacking open innovation neighborhoods: le milieu of the lean smart city                                                           | Dezi, L<br>Pisano, P<br>Pironti, M<br>Papa, A                                          | 10.1108/MD-04-2017-0407        |
| 149 - Collaborative Innovation with External Actors: An Empirical Study on Open Innovation Platforms in Smart Cities                      | Ojasalo, K<br>Kauppinen, H                                                             |                                |
| 150 - An orchestration approach to smart city data ecosystems                                                                             | Gupta, A<br>Panagiotopoulos, P<br>Bowen, F                                             | 10.1016/j.techfore.2020.119929 |
| 151 - A case-based learning methodology to predict barriers to implementation of smart and sustainable urban energy projects              | Mosannenzadeh, F<br>Bisello, A<br>Diamantini, C<br>Stellin, G<br>Vettorato, D          | 10.1016/j.cities.2016.07.007   |
| 152 - Chennai, India                                                                                                                      | Krishnamurthy, R<br>Desouza, KC                                                        | 10.1016/j.cities.2014.09.004   |
| 153 - The impacts of open data initiatives on smart cities: A framework for evaluation and monitoring                                     | Neves, FT<br>Neto, MD<br>Aparicio, M                                                   | 10.1016/j.cities.2020.102860   |
| 154 - Citizen Participation and the Rise of Digital Media Platforms in Smart Governance and Smart Cities                                  | Gil, O<br>Cortes-Cediel, ME<br>Cantador, I                                             | 10.4018/IJEPR.2019010102       |
| 155 - Defining the Role of the Smart-City Manager: An Analysis of Responsibilities and Skills                                             | Michelucci, FV<br>De Marco, A<br>Tanda, A                                              | 10.1080/10630732.2016.1164439  |
| 156 - Smart City appropriation by local actors: An instrument in the making                                                               | Desdemoustier, J<br>Crutzen, N<br>Cools, M<br>Teller, J                                | 10.1016/j.cities.2019.03.021   |

|                                                                                                                                                                         |                                                                                   |                                |
|-------------------------------------------------------------------------------------------------------------------------------------------------------------------------|-----------------------------------------------------------------------------------|--------------------------------|
| 157 - Integrating Open Innovation Platforms in Public Sector Decision Making: Empirical Results from Smart City Research                                                | Ojasalo, K<br>Tahtinen, L                                                         |                                |
| 158 - Environmental Technology, Materials Science, Architectural Design, and Real Estate Market Evaluation: A Multidisciplinary Approach for Energy-Efficient Buildings | Fregonara, E<br>Curto, R<br>Grosso, M<br>Mellano, P<br>Rolando, D<br>Tulliani, JM | 10.1080/10630732.2013.855512   |
| 159 - The role of tourism in planning the smart city                                                                                                                    | La Rocca, RA                                                                      | 10.6092/1970-9870/2814         |
| 160 - Light the way for smart cities: Lessons from Philips Lighting                                                                                                     | Brock, K<br>Den Ouden, E<br>Van der Klauw, K<br>Podoyntsyna, K<br>Langerak, F     | 10.1016/j.techfore.2018.07.021 |
| 161 - Intermediation in public procurement of innovation: How Amsterdam's startup-in-residence programme connects startups to urban challenges                          | Van Winden, W<br>Carvalho, L                                                      | 10.1016/j.respol.2019.04.013   |
| 162 - A smart city is a less polluted city                                                                                                                              | Chu, Z<br>Cheng, MW<br>Yu, NN                                                     | 10.1016/j.techfore.2021.121037 |
| 163 - Are global north smart city models capable to assess Latin American cities? A model and indicators for a new context                                              | Marachetti, D<br>Oliveira, R<br>Figueira, AR                                      | 10.1016/j.cities.2019.04.001   |
| 164 - Reframing urban overtourism through the Smart-City Lens                                                                                                           | Pasquinelli, C<br>Trunfio, M                                                      | 10.1016/j.cities.2020.102729   |
| 165 - Smart city for sustainable environment: A comparison of participatory strategies from Helsinki, Singapore and London                                              | Shamsuzzoha, A<br>Nieminen, J<br>Piya, S<br>Rutledge, K                           | 10.1016/j.cities.2021.103194   |
| 166 - Big data driven multi-tier architecture for electric mobility as a service in smart cities A design science approach                                              | Anthony, B<br>Petersen, SA<br>Ahlers, D<br>Krogstie, J                            | 10.1108/IJESM-08-2019-0001     |
| 167 - Creative citizenship: the new wave for collaborative environments in smart cities                                                                                 | Bolivar, MPR                                                                      | 10.1108/ARLA-04-2017-0133      |
| 168 - The "Sustainable" in smart cities: ignoring the importance of urban ecosystems                                                                                    | Mundoli, S<br>Unnikrishnan, H<br>Nagendra, H                                      | 10.1007/s40622-017-0152-x      |
| 169 - Privacy concerns in China's smart city campaign: The deficit of China's Cybersecurity Law                                                                         | Yang, F<br>Xu, J                                                                  | 10.1002/app5.246               |
| 170 - Why distance matters: The relatedness between technology development and its appropriation in smart cities                                                        | Kummitha, RKR                                                                     | 10.1016/j.techfore.2020.120087 |
| 171 - Towards smarter and more sustainable cities: the remourban model                                                                                                  | Garcia-Fuentes, MA<br>De Torre, C                                                 | 10.9770/jesi.2017.4.3S(8)      |

|                                                                                                                                                                                          |                                                                        |                                |
|------------------------------------------------------------------------------------------------------------------------------------------------------------------------------------------|------------------------------------------------------------------------|--------------------------------|
| 172 - Sustainable smart city development framework for developing countries                                                                                                              | Bhattacharya, TR<br>Bhattacharya, A<br>McLellan, B<br>Tezuka, T        | 10.1080/17535069.2018.1537003  |
| 173 - Crowdfunding for the development of smart cities                                                                                                                                   | Care, S<br>Trotta, A<br>Care, R<br>Rizzello, A                         | 10.1016/j.bushor.2017.12.001   |
| 174 - Developing the PlanIT Valley: a view on the governance and societal embedding of u-eco city pilots                                                                                 | Carvalho, L<br>Campos, JB                                              | 10.1504/IJKBD.2013.054089      |
| 175 - Smart Technologies, Back-to-the-Village Rhetoric, and Tactical Urbanism: Post-COVID Planning Scenarios in Italy                                                                    | Graziano, T                                                            | 10.4018/IJEPR.20210401.oa7     |
| 176 - Software systems from smart city vendors                                                                                                                                           | Saborido, R<br>Alba, E                                                 | 10.1016/j.cities.2020.102690   |
| 177 - Why do cities adopt smart technologies? Contingency theory and evidence from the United States                                                                                     | Araral E                                                               | 10.1016/j.cities.2020.102873   |
| 178 - Less smart more city                                                                                                                                                               | Papa, R<br>Gargiulo, C<br>Cristiano, M<br>Di Francesco, I<br>Tulisi, A | 10.6092/1970-9870/3012         |
| 179 - When Alphabet Inc. Plans Toronto's Waterfront: New Post-Political Modes of Urban Governance                                                                                        | Carr, C<br>Hesse, M                                                    | 10.17645/up.v5i1.2519          |
| 180 - The impact of traffic congestion when optimising delivery routes in real time. A case study in Spain                                                                               | Alvarez, P<br>Lerga, I<br>Serrano-Hernandez, A<br>Faulin, J            | 10.1080/13675567.2018.1457634  |
| 181 - Innovation in emerging economies: Research on the digital economy driving high-quality green development                                                                           | Ma, D<br>Zhu, Q                                                        | 10.1016/j.jbusres.2022.03.041  |
| 182 - Exploring diverse lived experiences in the Smart City through Creative Analytic Practice                                                                                           | Edge, S<br>Boluk, K<br>Groulx, M<br>Quick, M                           | 10.1016/j.cities.2019.102478   |
| 183 - Measuring the value and the role of soft assets in smart city development                                                                                                          | Wataya, E<br>Shaw, R                                                   | 10.1016/j.cities.2019.04.019   |
| 184 - Identifying and supporting exploratory and exploitative models of innovation in municipal urban planning; key challenges from seven Norwegian energy ambitious neighborhood pilots | Lindkvist, C<br>Nielsen, BF<br>Baer, D                                 | 10.1016/j.techfore.2018.11.007 |
| 185 - Strategic Energy Planning of Residential Buildings in a Smart City: A System Dynamics Approach                                                                                     | Caponio, G<br>Massaro, V<br>Mossa, G<br>Mummolo, G                     | 10.5772/61768                  |

|                                                                                                                         |                                                                                      |                                |
|-------------------------------------------------------------------------------------------------------------------------|--------------------------------------------------------------------------------------|--------------------------------|
| 186 - Smart local energy systems (SLES): A framework for exploring transition, context, and impacts                     | Ford, R<br>Maidment, C<br>Vigurs, C<br>Fell, MJ<br>Morris, M                         | 10.1016/j.techfore.2021.120612 |
| 187 - A typology of Smart City services: The case of Data Protection Impact Assessment                                  | Vandercruysse, L<br>Buts, C<br>Dooms, M                                              | 10.1016/j.cities.2020.102731   |
| 188 - Creative and science oriented employees and firm-level innovation                                                 | Brunow, S<br>Birkeneder, A<br>Rogriguez-Pose, A                                      | 10.1016/j.cities.2018.02.002   |
| 189 - "Mapping" Smart Cities                                                                                            | Loo, BPY<br>Tang, WSM                                                                | 10.1080/10630732.2019.1576467  |
| 190 - Smart communities social innovation at the service of the smart cities                                            | Bencardino, M<br>Greco, I                                                            |                                |
| 191 - Incorporating a Systemic and Foresight Approach into Smart City Initiatives: The Case of Spanish Cities           | Fernandez-Guel, JM<br>Collado-Lara, M<br>Guzman-Arana, S<br>Fernandez-Anez, V        | 10.1080/10630732.2016.1164441  |
| 192 - The Smart City Ecosystem as an Innovation Model: Lessons from Montreal                                            | Khomsi, MR                                                                           |                                |
| 193 - Pathways to the Making of Prosperous Smart Cities: An Exploratory Study on the Best Practice                      | Desouza, KC<br>Hunter, M<br>Jacob, B<br>Yigitcanlar, T                               | 10.1080/10630732.2020.1807251  |
| 194 - Investigating the barriers faced by stakeholders in open data development: A study on Hong Kong as a "smart city" | Ma, RQ<br>Lam, PTI                                                                   | 10.1016/j.cities.2019.03.009   |
| 195 - Big data visualisation, geographic information systems and decision making in healthcare management               | Chinnaswamy, A<br>Papa, A<br>Dezi, L<br>Mattiacci, A                                 | 10.1108/MD-07-2018-0835        |
| 196 - The Intelligent Method (II) for "smarter" urban policy-making and regulation drafting                             | Marsal-Llacuna, ML<br>Segal, ME                                                      | 10.1016/j.cities.2016.05.006   |
| 197 - Assembling Sustainable Smart City Transitions: An Interdisciplinary Theoretical Perspective                       | Mora, L<br>Deakin, M<br>Zhang, XL<br>Batty, M<br>De Jong, M<br>Santi, P<br>Appio, FP | 10.1080/10630732.2020.1834831  |
| 198 - Planners in the Future City: Using City Information Modelling to Support Planners as Market Actors                | Thompson, EM<br>Greenhalgh, P<br>Muldoon-Smith, K<br>Charlton, J<br>Dolnik, M        | 10.17645/up.v1i1.556           |
| 199 - Barriers and risks of Mobility-as-a-Service (MaaS) adoption in cities: A systematic review of the literature      | Butler, L<br>Yigitcanlar, T<br>Paz, A                                                | 10.1016/j.cities.2020.103036   |
| 200 - Urban facility management                                                                                         | Salaj, AT<br>Lindkvist, CM                                                           | 10.1108/F-06-2020-0078         |

|                                                                                                                                        |                                                                      |                               |
|----------------------------------------------------------------------------------------------------------------------------------------|----------------------------------------------------------------------|-------------------------------|
| 201 - The end-use electric energy consumption in urban areas: A GIS-based methodology. An application in the city of Naples            | Carpentieri, G<br>Favo, F                                            | 10.6092/1970-9870/5173        |
| 202 - Smart cities for wellbeing: youth employment and their skills on computers                                                       | Picatoste, J<br>Perez-Ortiz, L<br>Ruesga-Benito, SM<br>Novo-Corti, I | 10.1108/JSTPM-04-2017-0014    |
| 203 - Smart prevention: A new approach to primary and secondary cancer prevention in smart and connected communities                   | Wray, A<br>Olstad, DL<br>Minaker, LM                                 | 10.1016/j.cities.2018.02.022  |
| 204 - Contemporary Production and Urban Change: The Case of Milan                                                                      | Armondi, S<br>Bruzzese, A                                            | 10.1080/10630732.2017.1311567 |
| 205 - Universities and smart cities: the challenges to high quality                                                                    | Anttila, J<br>Jussila, K                                             | 10.1080/14783363.2018.1486552 |
| 206 - Brisbane's digital strategy: an economic strategy for the digital age?                                                           | Alizadeh, T<br>Sipe, N                                               | 10.1080/07293682.2015.1019753 |
| 207 - Participatory Urban Planning: What Would Make Planners Trust the Citizens?                                                       | Astrom, J                                                            | 10.17645/up.v5i2.3021         |
| 208 - Governance in Smart Cities: A Comparison of Practitioners' Perceptions and Prior Research                                        | Bolviar, MPR                                                         | 10.4018/IJEPR.2018040101      |
| 209 - Smart neighbourhood: A TISM approach to reduce urban polarization for the sustainable development of smart cities                | Kumar, H<br>Singh, MK<br>Gupta, MP<br>Madaan, J                      | 10.1108/JSTPM-04-2017-0009    |
| 210 - How Do ICTs Affect Urban Spatial Structure? A Systematic Literature Review                                                       | Yousefi, Z<br>Dadashpoor, H                                          | 10.1080/10630732.2019.1689593 |
| 211 - Smart Cities: A Survey on New Developments, Trends, and Opportunities                                                            | Bohloul, SM                                                          | 10.1142/S2424862220500128     |
| 212 - One size does not fit all: Framing smart city policy narratives within regional socio-economic contexts in Brussels and Wallonia | Esposito, G<br>Clement, J<br>Mora, L<br>Crutzen, N                   | 10.1016/j.cities.2021.103329  |
| 213 - Exploring the Smart Future of Participation: Community, Inclusivity, and People With Disabilities                                | Bricout, J<br>Baker, PMA<br>Moon, NW<br>Sharma, B                    | 10.4018/IJEPR.20210401.0a8    |
| 214 - The many faces of the smart city: Differing value propositions in the activity portfolios of nine cities                         | Csukas, MS<br>Szabo, RZ                                              | 10.1016/j.cities.2021.103116  |
| 215 - Mapping Platform Urbanism: Charting the Nuance of the Platform Pivot                                                             | Lee, A<br>Mackenzie, A<br>Smith, GJD<br>Box, P                       | 10.17645/up.v5i1.2545         |
| 216 - From Smart-Cities to Smart-Communities: How Can We Evaluate the Impacts of Innovation and Inclusive Processes in Urban Context?  | De Filippi, F<br>Coscia, C<br>Guido, R                               | 10.4018/IJEPR.2019040102      |
| 217 - The Ubiquitous-Eco-City of Songdo: An Urban Systems Perspective on South Korea's Green City Approach                             | Mullins, PD                                                          | 10.17645/up.v2i2.933          |

|                                                                                                                                                                    |                                                                  |                               |
|--------------------------------------------------------------------------------------------------------------------------------------------------------------------|------------------------------------------------------------------|-------------------------------|
| 218 - Strategy ontology construction and learning: insights from smart city strategies                                                                             | Taamallah, A<br>Khemaja, M<br>Faiz, S                            | 10.1504/IJKBD.2017.086427     |
| 219 - Exploring issues limiting the use of knowledge in disaster risk reduction                                                                                    | Norton, J<br>Atun, F<br>Dandoulaki, M                            | 10.6092/1970-9870/3032        |
| 220 - Smart City Planning: Complexity                                                                                                                              | Ekman, U                                                         | 10.4018/IJEPR.2018070101      |
| 221 - Mapping the Knowledge Domain of Smart City Development to Urban Sustainability: A Scientometric Study                                                        | Wu, ZZ<br>Jiang, MY<br>Li, H<br>Zhang, XL                        | 10.1080/10630732.2020.1777045 |
| 222 - Smart City Projects Assessment Matrix: Connecting Challenges and Actions in the Mediterranean Region                                                         | Fernandez-Anez, V<br>Velazquez, G<br>Perez-Prada, F<br>Monzon, A | 10.1080/10630732.2018.1498706 |
| 223 - The advantages of and barriers to being smart in a smart city: The perceptions of project managers within a smart city cluster project in Greater Copenhagen | Bjorner, T                                                       | 10.1016/j.cities.2021.103187  |
| 224 - Building City Dashboards for Different Types of Users                                                                                                        | Young, GW<br>Kitchin, R<br>Naji, J                               | 10.1080/10630732.2020.1759994 |
| 225 - Smart cities A literature review and business network approach discussion on the management of organisations                                                 | Oberg, C<br>Graham, G<br>Hennelly, P                             | 10.1108/IMP-06-2015-0024      |
| 226 - Implementing smart city strategies in Greece: Appetite for success                                                                                           | Siokas, G<br>Tsakanikas, A<br>Siokas, E                          | 10.1016/j.cities.2020.102938  |
| 227 - A Sociotechnical Framework for Smart Urban Governance: Urban Technological Innovation and Urban Governance in the Realm of Smart Cities                      | Jiang, HX<br>Geertman, S<br>Witte, P                             | 10.4018/IJEPR.2020010101      |
| 228 - Information Sharing as a Dimension of Smartness: Understanding Benefits and Challenges in Two Megacities                                                     | Gil-Garcia, JR<br>Pardo, TA<br>De Tuya, M                        | 10.1177/1078087419843190      |
| 229 - Smart city research: A holistic and state-of-the-art literature review                                                                                       | Zhao, F<br>Fashola, OI<br>Olawajun, TI<br>Onwumere, I            | 10.1016/j.cities.2021.103406  |
| 230 - Is a New 'Planning 3.0' Paradigm Emerging? Exploring the Relationship between Digital Technologies and Planning Theory and Practice                          | Potts, R                                                         | 10.1080/14649357.2020.1748699 |
| 231 - Success factors of smart cities A systematic review of literature from 2000-2018                                                                             | Aldegheishem, A                                                  | 10.6092/1970-9870/5893        |
| 232 - Ecosystems for smart cities: tracing the evolution of governance structures in a dutch smart city initiative                                                 | Oo,s, W<br>Caniels, MCJ<br>Roijsackers, N<br>Cobben, D           | 10.1007/s11365-020-00640-7    |
| 233 - A relational exploratory study of business incubation and smart cities - Findings from Europe                                                                | Blanck, M<br>Ribeiro, JLD<br>Anzanello, MJ                       | 10.1016/j.cities.2018.12.032  |

|                                                                                                                                   |                                                                                                                                                                          |                                |
|-----------------------------------------------------------------------------------------------------------------------------------|--------------------------------------------------------------------------------------------------------------------------------------------------------------------------|--------------------------------|
| 234 - Smart city initiatives in the context of digital transformation - scope, services and technologies                          | Tomicic-Pupek, K<br>Pihir, I<br>Furjan, MT                                                                                                                               | 10.30924/mjcmi.24.1.3          |
| 235 - Olympic Technologies: Tokyo 2020 and Beyond: The Urban Technology Metropolis                                                | Kassens-Noor, E<br>Fukushige, T                                                                                                                                          | 10.1080/10630732.2016.1157949  |
| 236 - Geocraft as a Means to Support the Development of Smart Cities, Getting the People of the Place Involved - Youth Included - | Scholten, H<br>Fruijtier, S<br>Dias, E<br>Hettinga, S<br>Opmeer, M<br>Van Leeuwen, WS<br>Linde, M<br>Bos, S<br>Vaughan, R<br>Van Kaam, H<br>Van Manen, N<br>Fruijtier, C | 10.12776/QIP.V21I1.784         |
| 237 - Is there enough trust for the smart city? exploring acceptance for use of mobile phone data in oslo and tallinn             | Julsrud, TE<br>Jrogstad, JR                                                                                                                                              | 10.1016/j.techfore.2020.120314 |
| 238 - Going Beyond the Smart City? Implementing Technopolitical Platforms for Urban Democracy in Madrid and Barcelona             | Smith, A<br>Martin, PP                                                                                                                                                   | 10.1080/10630732.2020.1786337  |
| 239 - Cities at risk? Exploring the synergies between smartphones and everyday vulnerability                                      | Amankwaa, EF<br>Blay, KB                                                                                                                                                 | 10.1016/j.cities.2018.06.015   |
| 240 - Vancouver's Digital Strategy: Disruption, New Direction, or Business as Usual?                                              | Alizadeh, T<br>Sipe, N                                                                                                                                                   | 10.4018/IJEPR.2016100101       |
| 241 - Citizens' readiness to crowdsource smart city services: A developing country perspective                                    | Staletic, N<br>Labus, A<br>Bogdanovic, Z<br>Despotovic-Zrakic, M<br>Radenkovic, B                                                                                        | 10.1016/j.cities.2020.102883   |
| 242 - Strategic visualization: the (real) usefulness of cognitive mapping in smart city conceptualization                         | Vaz, ALA<br>Ferreira, FAF<br>Pereira, LF<br>Correia, RJC<br>Banaitis, A                                                                                                  | 10.1108/MD-11-2020-1512        |
| 243 - Smart City L'Aquila: An Application of the "Infostructure" Approach to Public Urban Mobility in a Post-Disaster Context     | Falco, E<br>Malavolta, I<br>Radzinski, A<br>Ruberto, S<br>Iovino, L<br>Gallo, F                                                                                          | 10.1080/10630732.2017.1362901  |
| 244 - Planning Smart(er) Cities: The Promise of Civic Technology                                                                  | Wilson, B<br>Chakraborty, A                                                                                                                                              | 10.1080/10630732.2019.1631097  |
| 245 - Do Smart City policies make cities more innovative: evidence from China                                                     | Xu, NN<br>Ding, YX<br>Guo, JH                                                                                                                                            | 10.1080/17516234.2020.1742411  |



|                                                                                                                                                                         |                                                                             |                               |
|-------------------------------------------------------------------------------------------------------------------------------------------------------------------------|-----------------------------------------------------------------------------|-------------------------------|
| 246 - Urban Innovation System and the Role of an Open Web-based Platform: The Case of Amsterdam Smart City                                                              | Putra, ZDW<br>Van der Knaap, WGM                                            | 10.5614/jrcp.2018.29.3.4      |
| 247 - Are UN SDGs useful for capturing multiple values of smart city?                                                                                                   | Grossi, G<br>Trunova, O                                                     | 10.1016/j.cities.2021.103193  |
| 248 - Towards a hybrid model for the management of smart city initiatives                                                                                               | Secinaro, S<br>Brescia, V<br>Calandra, D<br>Biancone, P                     | 10.1016/j.cities.2021.103278  |
| 249 - Cities of Resilience: Integrated Adaptive Planning                                                                                                                | Hudec, O                                                                    | 10.12776/QIP.V21I1.776        |
| 250 - Tales of a city: Sentiment analysis of urban green space in Dublin                                                                                                | Ghahramani, M<br>Galle, NJ<br>Ratti, C<br>Pilla, F                          | 10.1016/j.cities.2021.103395  |
| 251 - Digital Transformation of City Ecosystems: Platforms Shaping Engagement and Externalities across Vertical Markets                                                 | Komninos, N<br>Kakderi, C<br>Collado, A<br>Papadaki, I<br>Panori, A         | 10.1080/10630732.2020.1805712 |
| 252 - How Technologies Can Enhance Open Policy Making and Citizen-Responsive Urban Planning: MiraMap - A Governing Tool for the Mirafiori Sud District in Turin (Italy) | De Filippi, F<br>Coscia, C<br>Guido, R                                      | 10.4018/IJEPR.2017010102      |
| 253 - Googling the City: In Search of the Public Interest on Toronto's 'Smart' Waterfront                                                                               | Morgan, K<br>Webb, B                                                        | 10.17645/up.v5i1.2520         |
| 254 - Infostructures: Towards a Complementary Approach for Solving Urban Challenges through Digital Technologies                                                        | Tomitsch, M<br>Haeusler, MH                                                 | 10.1080/10630732.2015.1040296 |
| 255 - Unicorn planning: Lessons from the rise and fall of an American 'smart' mega-development                                                                          | Rebentisch, H<br>Thompson, C<br>Cote-Roy, L<br>Moser, S                     | 10.1016/j.cities.2020.102686  |
| 256 - Participatory governance in smart cities: the urbanAPI case study                                                                                                 | Soomro, K<br>Khan, Z<br>Ludlow, D                                           | 10.1504/IJSTM.2017.088945     |
| 257 - Tourism and city reflections about tourist dimension of smart city                                                                                                | La Rocca, RA                                                                | 10.6092/1970-9870/1483        |
| 258 - Urban resilience and sustainable development policies An analysis of smart cities in the state of Sao Paulo                                                       | Da Silva, CA<br>Dos Santos, EA<br>Maier, SM<br>Da Rosa, FS                  | 10.1108/REGE-12-2018-0117     |
| 259 - Blockchain: The operating system of smart cities                                                                                                                  | Bagloee, SA<br>Heshmati, M<br>Dia, H<br>Ghaderi, H<br>Pettit, C<br>Asadi, M | 10.1016/j.cities.2021.103104  |

|                                                                                                                                                      |                                                                                           |                                  |
|------------------------------------------------------------------------------------------------------------------------------------------------------|-------------------------------------------------------------------------------------------|----------------------------------|
| 260 - Digital Social Innovation and the Adoption of #PlanTech: The Case of Coventry City Council                                                     | Devlin, C                                                                                 | 10.17645/up.v5i4.3214            |
| 261 - Will smart cities enhance the social capital of residents? The importance of smart neighborhood management                                     | Nakano, S<br>Washizu, A                                                                   | 10.1016/j.cities.2021.103244     |
| 262 - Smart City, Integrated Planning, and Multilevel Governance: A Conceptual Framework for e-Planning in Europe                                    | Damurski, L                                                                               | 10.4018/IJEPR.2016100103         |
| 263 - A value of civic voices for smart city: A big data analysis of civic queries posed by Seoul citizens                                           | Kim, B<br>Yoo, M<br>Park, KC<br>Lee, KR<br>Kim, JH                                        | 10.1016/j.cities.2020.102941     |
| 264 - The ideological justifications of the Smart City of Hamburg                                                                                    | Bar, L<br>Ossewaarde, M<br>Van Gerven, M                                                  | 10.1016/j.cities.2020.102811     |
| 265 - Input-Output Modeling for Smart City Development                                                                                               | Noori, N<br>De Jong, M<br>Janssen, M<br>Schraven, D<br>Hoppe, T                           | 10.1080/10630732.2020.1794728    |
| 266 - Technology and innovation towards the smart city. Advances, perspectives and challenges                                                        | Copaja-alegre, M<br>Esponda-Alva, C                                                       | 10.15446/bitacora.v29n2.68333    |
| 267 - Understanding the linkages of smart-city technologies and applications: Key lessons from a text mining approach and a call for future research | Lim, C<br>Cho, GH<br>Kim, J                                                               | 10.1016/j.techfore.2021.120893   |
| 268 - Investigating the information security management role in smart city organisations                                                             | Hasbini, MA<br>Eldabi, T<br>Aldallal, A                                                   | 10.1108/WJEMSD-07-2017-0042      |
| 269 - Big Data Strategies for Government, Society and Policy-Making                                                                                  | Lee, JW                                                                                   | 10.13106/jafeb.2020.vol7.no7.475 |
| 270 - Data-driven development in the smart city: Generative design for refugee camps in Luxembourg                                                   | Daher, E<br>Kubicki, S<br>Guerriero, A                                                    | 10.9770/jesi.2017.4.3S(11)       |
| 271 - Future smart cities requirements, emerging technologies, applications, challenges, and future aspects                                          | Javed, AR<br>Shahzad, F<br>Rehman, SU<br>Bin Zikria, Y<br>Razzak, I<br>Jalil, Z<br>Xu, GD | 10.1016/j.cities.2022.103794     |
| 272 - What are the key factors affecting smart city transformation readiness? Evidence from Australian cities                                        | Yigitcanlar, T<br>Degirmenci, K<br>Butler, L<br>Desouza, KC                               | 10.1016/j.cities.2021.103434     |
| 273 - Economic opportunities for creating smart cities in Poland. Does wealth matter?                                                                | Jonek-Kowalska, I<br>Wolniak, R                                                           | 10.1016/j.cities.2021.103222     |
| 274 - Exploring development of smart city research through perspectives of                                                                           | Zhou, SL<br>Zhang, X                                                                      | 10.1108/JSTPM-05-2019-0051       |

|                                                                                                                                                             |                                                                               |                                |
|-------------------------------------------------------------------------------------------------------------------------------------------------------------|-------------------------------------------------------------------------------|--------------------------------|
| governance and information systems: a scientometric analysis using CiteSpace                                                                                | Liu, J<br>Zhang, KH<br>Zhao, YQ                                               |                                |
| 275 - Making smart cities work in the face of conflicts: lessons from practitioners of South Korea's U-City projects                                        | Kim, JS                                                                       | 10.3828/tpr.2015.33            |
| 276 - Marketing innovation and internationalization in smart city development: a systematic review, framework and research agenda                           | Christofi, M<br>Iaia, L<br>Marchesani, F<br>Masciarelli, F                    | 10.1108/IMR-01-2021-0027       |
| 277 - Sustainable Cities and Healthy Cities: Are They the Same?                                                                                             | Portney, KE<br>Sansom, GT                                                     | 10.17645/up.v2i3.1018          |
| 278 - EU Smart City Governance                                                                                                                              | Gargiulo, C<br>Pinto, V<br>Zucaro, F                                          | 10.6092/1970-9870/1980         |
| 279 - Gold Coast smart city strategy: informed by local planning priorities and international smart city best practices                                     | Alizadeh, T<br>Irajifar, L                                                    | 10.1504/IJKBD.2018.092708      |
| 280 - A cross-disciplinary path to healthy and energy efficient buildings                                                                                   | Lex, SW<br>Cari, D<br>Rasmussen, MK<br>Bacher, P<br>Bachalarz, M<br>Madsen, H | 10.1016/j.techfore.2018.07.023 |
| 281 - Jakarta: A city of cities                                                                                                                             | Martinez, R<br>Masron, IN                                                     | 10.1016/j.cities.2020.102868   |
| 282 - Shaping an alternative smart city discourse through Twitter: Amsterdam and the role of creative migrants                                              | Monachesi, P                                                                  | 10.1016/j.cities.2020.102664   |
| 283 - Exploring urban facilities management approaches to increase connectivity in smart cities                                                             | Lindkvist, C<br>Salaj, AT<br>Collins, D<br>Bjorberg, S<br>Haugen, TB          | 10.1108/F-08-2019-0095         |
| 284 - Modeling the smartness or smart development levels of developing countries' cities                                                                    | Antwi-Afari, P<br>Owusu-Manu, DG<br>Ng, ST<br>Asumadu, G                      | 10.1016/j.jum.2021.06.005      |
| 285 - Cultural heritage, smart cities and digital data analytics                                                                                            | Kourtiti, K                                                                   |                                |
| 286 - Data-Driven Smart Sustainable Cities of the Future: A Novel Model of Urbanism and Its Core Dimensions, Strategies, and Solutions                      | Bibri, SE<br>Krogstie, J                                                      | 10.6531/JFS.202012_25(2).0009  |
| 287 - Sustainability reporting in smart cities: A multidimensional performance measures                                                                     | Buallay, A<br>El Khoury, R<br>Hamdan, A                                       | 10.1016/j.cities.2021.103397   |
| 288 - Unplugged - Thinking the organisational and managerial challenges of intelligent towns and cities: a critical approach to the Smart Cities phenomenon | Lebrument, N<br>De La Robertie, C                                             |                                |

|                                                                                                                                                           |                                                                                           |                                |
|-----------------------------------------------------------------------------------------------------------------------------------------------------------|-------------------------------------------------------------------------------------------|--------------------------------|
| 289 - Smart Cities and M-3: Rapid Research, Meaningful Metrics and Co-Design                                                                              | Bell, S<br>Benatti, F<br>Edwards, NT<br>Laney, R<br>Morse, DR<br>Piccolo, L<br>Zanetti, O | 10.1007/s11213-017-9415-x      |
| 290 - Comparative analyzes of technological tools between industry 4.0 and smart cities approaches: The new society ecosystem                             | Storolli, WG<br>Makiya, IK<br>Cesar, FIG                                                  | 10.14807/ijmp.v10i3.792        |
| 291 - Antecedents of entrepreneurial intentions in smart city of Neom Saudi Arabia: Does the entrepreneurial education on artificial intelligence matter? | Nuseir, MT<br>Basheer, MF<br>Aljumah, A                                                   | 10.1080/23311975.2020.1825041  |
| 292 - Songdo IBD (International Business District): experimental prototype for the city of tomorrow?                                                      | Rugkhapan, NT<br>Murray, MJ                                                               | 10.1080/13563475.2019.1650725  |
| 293 - Digital Participatory Platforms for Urban Regeneration: A Survey of Italian Case Studies                                                            | De Filippi, F<br>Coscia, C<br>Cocina, GG                                                  | 10.4018/IJEPR.2020070103       |
| 294 - One approach does not fit all (smart) cities: Causal recipes for cities' use of "data and analytics"                                                | Ruhlandt, RWS<br>Levitt, R<br>Jain, R<br>Hall, D                                          | 10.1016/j.cities.2020.102800   |
| 295 - Dual models and technological platforms for efficient management of water consumption                                                               | Rey-Moreno, M<br>Medina, Molina, C                                                        | 10.1016/j.techfore.2019.119761 |
| 296 - What is smart? A real estate introduction to cities and buildings in the digital era                                                                | Lecomte, P                                                                                | 10.1177/0306307018823108       |
| 297 - Intention to live in a smart city based on its characteristics in the perception by the young public                                                | Pinochet, LHC<br>Romani, GF<br>De Souza, CA<br>Rodriguez-Abitia, G                        | 10.1108/REGE-06-2018-0077      |
| 298 - Smart urban governance in the 'smart' era: Why is it urgently needed?                                                                               | Jiang, HX                                                                                 | 10.1016/j.cities.2020.103004   |
| 299 - Supporting smart citizens: Design templates for co-designing data-intensive technologies                                                            | Wolff, A<br>Barcker, M<br>Hudson, L<br>Seffah, A                                          | 10.1016/j.cities.2020.102695   |
| 300 - Self-sustainable smart cities: Socio-spatial society using participative bottom-up and cognitive top-down approach                                  | Goel, RK<br>Yadav, CS<br>Vishnoi, S                                                       | 10.1016/j.cities.2021.103370   |
| 301 - Appraisal of the drivers of smart city development in South Africa                                                                                  | Oke, AE<br>Aghimien, DO<br>Aigbavboa, CO<br>Akinradewo, OI                                | 10.5130/AJCEB.v20i2.6632       |
| 302 - The application of smart cities concept for citizens of Lithuanian and Sweden: Comperative analysis                                                 | Dudzeviciute, G<br>Simelyte, A<br>Liucvaitiene, A                                         | 10.14807/ijmp.v8i4.659         |

|                                                                                                                                                    |                                                                             |                               |
|----------------------------------------------------------------------------------------------------------------------------------------------------|-----------------------------------------------------------------------------|-------------------------------|
| 303 - Improving resilience of cities through smart city drivers                                                                                    | Oke, AE<br>Aghimien, DO<br>Akinradewo, OI<br>Aigbavboa, CO                  | 10.5130/AJCEB.v20i2.6647      |
| 304 - Sustainable development of smart cities in the context of the implementation of the tire recycling program                                   | Khudyakova, T<br>Shmidt, A<br>Shmidt, S                                     | 10.9770/jesi.2020.8.2(42)     |
| 305 - Platform Urbanism: Technocapitalist Production of Private and Public Spaces                                                                  | Bauriedl, S<br>Struver, A                                                   | 10.17645/up.v5i4.3414         |
| 306 - Urban smartness vs urban competitiveness a comparison of Italian cities rankings                                                             | Papa, R<br>Gargiulo, C<br>Franco, S<br>Russo, L                             |                               |
| 307 - Smarter organizations: insights from a smart city hybrid framework                                                                           | Lima, M                                                                     | 10.1007/s11365-020-00690-x    |
| 308 - The strategic, organizational, and entrepreneurial evolution of smart cities                                                                 | Schiavone, F<br>Appio, FP<br>Mora, L<br>Risitano, M                         | 10.1007/s11365-020-00696-5    |
| 309 - Balancing Exploration and Exploitation in Sustainable Urban Innovation: An Ambidexterity Perspective toward Smart Cities                     | Van den Buuse, D<br>Van Winden, W<br>Schrama, W                             | 10.1080/10630732.2020.1835048 |
| 310 - Can the Pandemic Be a Catalyst of Spatial Changes Leading Towards the Smart City?                                                            | Zgorska, B<br>Kamrowska-Zaluska, D<br>Lorens, P                             | 10.17645/up.v6i4.4485         |
| 311 - A netnographic research on citizen's perception of a future smart city                                                                       | El Hilali, S<br>Azougagh, A                                                 | 10.1016/j.cities.2021.103233  |
| 312 - The role of stakeholders in shaping smart solutions in polish cities                                                                         | Kornec, R                                                                   | 10.9770/jesi.2020.7.3(36)     |
| 313 - Smart city. Four approaches to the concept of understanding                                                                                  | Baraniewicz-Kotasinska, S                                                   | 10.1080/17535069.2020.1818817 |
| 314 - From social distancing to virtual connections How the surge of remote working could remold shared spaces                                     | Errichiello, L<br>Demarco, D                                                | 10.6092/1970-9870/6902        |
| 315 - Smart city and metropolitan area the energy component in the case studies of Genoa and Naples                                                | Battarra, R<br>Lombardi, C<br>Raimondo, M                                   | 10.6092/1970-9870/3008        |
| 316 - The urban digital lifestyle: An analytical framework for placing digital practices in a spatial context and for developing applicable policy | Hatuka, T<br>Zur, H<br>Mendoza, JA                                          | 10.1016/j.cities.2020.102978  |
| 317 - Developing an indicators plan and software for evaluating Street Cleanliness and Waste Collection Services                                   | Lopez, I<br>Gutierrez, V<br>Collantes, F<br>Gil, D<br>Revilla, R<br>Gil, JL | 10.1016/j.jum.2017.06.002     |
| 318 - Social media as a distribution of emotions, not participation. Polish exploratory                                                            | Kowalik, K                                                                  | 10.1016/j.cities.2020.102995  |

|                                                                                                                                                                 |                                                                 |                                |
|-----------------------------------------------------------------------------------------------------------------------------------------------------------------|-----------------------------------------------------------------|--------------------------------|
| study in the EU smart city communication context                                                                                                                |                                                                 |                                |
| 319 - Crowdsourcing and Living Labs in Support of Smart Cities' Development                                                                                     | Papadopoulou, CA<br>Giaoutzi, M                                 | 10.4018/IJEPR.2017040102       |
| 320 - Exploring the evolution of urban emotions in the City of Seoul using social media information                                                             | Benabbou, R<br>Lee, H                                           | 10.1504/IJKBD.2019.103208      |
| 321 - Content analysis of literature on big data in smart cities                                                                                                | Tiwari, P<br>Ilavarasan, PV<br>Punia, S                         | 10.1108/BIJ-12-2018-0442       |
| 322 - Drivers of Public Demand of IoT-Enabled Smart City Services: A Regional Analysis                                                                          | Tanda, A<br>De Marco, A                                         | 10.1080/10630732.2018.1509585  |
| 323 - Innovations in green logistics in smart cities: USA and EU experience                                                                                     | Oaskannaya, T<br>Shaban, G                                      | 10.21272/mmi.2019.1-14         |
| 324 - Strategic Planning for Smart City Development: Assessing Spatial Inequalities in the Basic Service Provision of Metropolitan Cities                       | Du, MB<br>Zhang, XL<br>Mora, L                                  | 10.1080/10630732.2020.1803715  |
| 325 - Impact of smart logistics on smart city sustainable performance: an empirical investigation                                                               | Shee, HK<br>Miah, SJ<br>De Vass, T                              | 10.1108/IJLM-07-2020-0282      |
| 326 - Would 3D Digital Participatory Planning Improve Social Sustainability in Smart Cities? An Empirical Evaluation Study in Less-Advantaged Areas             | Bouzguenda, I<br>Fava, N<br>Alalouch, C                         | 10.1080/10630732.2021.1900772  |
| 327 - Pathways to sustainable waste management in Indian Smart Cities                                                                                           | Cheela, VRS<br>Ranjan, VP<br>Goel, S<br>John, M<br>Dubey, B     | 10.1016/j.jum.2021.05.002      |
| 328 - Triggering participation in smart cities: Political efficacy, public administration satisfaction and sense of belonging as drivers of citizens' intention | Lebrument, N<br>Zumbo-Lebrument, C<br>Rochette, C<br>Roulet, TJ | 10.1016/j.techfore.2021.120938 |
| 329 - How Local Policy Priorities Set the Smart City Agenda                                                                                                     | Clement, J<br>Crutzen, N                                        | 10.1016/j.techfore.2021.120985 |
| 330 - The Project Management Perspective for a Digital City                                                                                                     | Anthopoulos, LG<br>Ipsilantis, P<br>Kazantzi, V                 | 10.4018/ijitpm.2014010105      |
| 331 - Modeling and evaluating economic and ecological operation efficiency of smart city pilots                                                                 | Song, ML<br>Tan, KH<br>Wang, JL<br>Shen, ZY                     | 10.1016/j.cities.2022.103575   |
| 332 - What are the Challenges of Building a Smart City?                                                                                                         | Allahar, H                                                      | 10.22215/timreview/1388        |
| 333 - Exploring Smart City Project Implementation Risks in the Cities of Kakinada and Kanpur                                                                    | Gupta, K<br>Hall, RP                                            | 10.1080/10630732.2020.1796115  |
| 334 - How the smart governance model shapes cities? Cases from Europe                                                                                           | Demirel, D                                                      | 10.1108/JEC-08-2021-0115       |

|                                                                                                                                    |                                                                            |                                  |
|------------------------------------------------------------------------------------------------------------------------------------|----------------------------------------------------------------------------|----------------------------------|
| 335 - Open Data and Open Source Enabling Smart City Development: A Case Study in Hame Region                                       | Jussila, J<br>Kukkamaki, J<br>Mantyneva, M<br>Heinisuo, J                  | 10.22215/timreview/1266          |
| 336 - Visioning "smart city" across the Gulf Cooperation Council (GCC) countries                                                   | Saxena, S<br>Al-Tamimi, TASM                                               | 10.1108/FS-11-2017-0068          |
| 337 - The Smart City Evolution in South Korea: Findings from Big Data Analytics                                                    | Choi, C<br>Choi, J<br>Kim, C<br>Lee, D                                     | 10.13106/jafeb.2020.vol7.no1.301 |
| 338 - Managing knowledge in the context of smart cities: An organizational cultural perspective                                    | Abdalla, W<br>Suresh, S<br>Renukappa, S                                    | 10.7341/20201642                 |
| 339 - Strategy formulation for the sustainable development of smart cities: A case study of Nanjing, China                         | Yuan, JF<br>Xie, H<br>Yang, DJ<br>Xiahou, X<br>Skibniewski, MJ<br>Huang, W | 10.3846/ijspm.2020.13345         |
| 340 - Investigating the entrepreneurial perspective in smart city studies                                                          | Scornavacca, E<br>Paolone, F<br>Za, S<br>Martiniello, L                    | 10.1007/s11365-019-00630-4       |
| 341 - Urban crowdsourcing: Stakeholder selection and dynamic knowledge flows in high and low complexity projects                   | Steils, N<br>Hanine, S<br>Rochdane, H<br>Hamdani, S                        | 10.1016/j.indmarman.2021.02.011  |
| 342 - Identifying sources of innovation: Building a conceptual framework of the Smart City through a social innovation perspective | Costales, E                                                                | 10.1016/j.cities.2021.103459     |
| 343 - The specificities and practical applications of Chinese eco-cities                                                           | Bao, S<br>Toivonen, M                                                      | 10.1108/JSTPM-05-2014-0020       |
| 344 - New technologies for sustainable energy in the smart city: The wet theory                                                    | La Rocca, RA<br>Fistola, R                                                 | 10.6092/1970-9870/2267           |
| 345 - Blockchain-based smart contracts as new governance tools for the sharing economy                                             | Fiorentino, S<br>Bartolucci, S                                             | 10.1016/j.cities.2021.103325     |
| 346 - Urban governance and autonomous vehicles                                                                                     | Aoyama, Y<br>Leon, LFA                                                     | 10.1016/j.cities.2021.103410     |
| 347 - From a smart city to a smart up-country the new city-territory of L'Aquila                                                   | Di Ludovic, D<br>Properzi, P<br>Graziosi, F                                |                                  |
| 348 - What organizational conditions, in combination, drive technology enactment in government-led smart city projects?            | Mu, R<br>Haershan, M<br>Wu, PY                                             | 10.1016/j.techfore.2021.121220   |
| 349 - Data-driven innovation processes within federated networks                                                                   | Rizk, A<br>Stahlbrost, A<br>Elragal, A                                     | 10.1108/EJIM-05-2020-0190        |
| 350 - Application of technology to car parking facilities in Asian smart cities                                                    | Lam, PTI<br>Yang, WJ                                                       | 10.1108/JFM-05-2018-0031         |

|                                                                                                                                                  |                                                           |                                |
|--------------------------------------------------------------------------------------------------------------------------------------------------|-----------------------------------------------------------|--------------------------------|
| 351 - Gendering the smart city: A case study of Sejong City, Korea                                                                               | Chang, Ji-in<br>Choi, J<br>An, H<br>Chung, HY             | 10.1016/j.cities.2021.103422   |
| 352 - ESCO formation as enabling factor for smart cities development in European Union (EU): Spain case analysis                                 | Bellido, JM<br>Romero, BP                                 | 10.14807/ijmp.v6i4.325         |
| 353 - Citizen repertoires of smart urban safety: Perspectives from Rotterdam, the Netherlands                                                    | Butot, V<br>Bayerl, PS<br>Jacobs, G<br>De Haan, F         | 10.1016/j.techfore.2020.120164 |
| 354 - Expert-Amateurs and Smart Citizens: How Digitalization Reconfigures Lima's Water Infrastructure                                            | Hoefsloot, FI<br>Martinez, J<br>Richter, C<br>Pfeffer, K  | 10.17645/up.v5i4.3453          |
| 355 - Smart governance in institutional context: An in-depth analysis of Glasgow, Utrecht, and Curitiba                                          | Tomot, Z<br>Przebylilicz, E<br>Leleux, C                  | 10.1016/j.cities.2021.103195   |
| 356 - Innovation networks for social impact: An empirical study on multi-actor collaboration in projects for smart cities                        | Leite, E                                                  | 10.1016/j.jbusres.2021.09.072  |
| 357 - Developing Smart Regions: Proposal and Application of a Model for Island Territories                                                       | Priano, PH<br>Armas, RL<br>Guerra, CF                     | 10.4018/IJEPR.2018040106       |
| 358 - Conceptualizing Small and Medium-Sized Smart Cities in the Mediterranean Region: An Ontological Approach                                   | Panagiotopoulou, M<br>Kokla, M<br>Stratigea, A            | 10.4018/IJEPR.2019100102       |
| 359 - Quality of Life @ Palava Smart City: A Case Study                                                                                          | Madakam, S<br>Ramaswamy, R<br>Date, H                     | 10.1177/0972150917721822       |
| 360 - Smart city trends: A focus on 5 countries and 15 companies                                                                                 | Kim, J                                                    | 10.1016/j.cities.2021.103551   |
| 361 - Area-Based Urban Renewal Approach for Smart Cities Development in India: Challenges of Inclusion and Sustainability                        | Praharaj, S                                               | 10.17645/up.v6i4.4484          |
| 362 - Antecedents and Consequences of Digital Entrepreneurial Ecosystems in the Interaction Process with Smart City Development                  | Gorelova, I<br>Dimitrieva, D<br>Dedova, M<br>Savastano, M | 10.3390/admsci11030094         |
| 363 - The role of urban rankings in the construction of perception on innovation in smart cities                                                 | De Almeida, GGF                                           | 10.5585/iji.v7i1.391           |
| 364 - Scaling smartness, (de)provincialising the city? The ASEAN Smart Cities Network and the translational politics of technocratic regionalism | Kong, L<br>Woods, O                                       | 10.1016/j.cities.2021.103326   |
| 365 - Application of Unmanned Aircraft Systems for smart city transformation: Case study Belgrade                                                | Ilic, D<br>Milosevic, I<br>Ilic-Kosanovic, T              | 10.1016/j.techfore.2022.121487 |
| 366 - Smartness and Italian cities A cluster analysis                                                                                            | Boscacci, F<br>Maltese, I                                 |                                |



|                                                                                                                                                 |                                                                  |                                |
|-------------------------------------------------------------------------------------------------------------------------------------------------|------------------------------------------------------------------|--------------------------------|
|                                                                                                                                                 | Mariotti, I                                                      |                                |
| 367 - Challenges of "gender" for more human-centered smart cities between theory, practice and desirable future scenarios                       | Pultrone, G                                                      | 10.6092/2281-4574/1566         |
| 368 - Smart city visions: pathways to participatory planning in two American cities                                                             | Fletcher, AL                                                     | 10.1108/FS-04-2020-0036        |
| 369 - Are Gasoline Prices a Factor in Residential Relocation Decisions? Preliminary Findings from the American Housing Survey, 1996-2008        | Chi, GQ<br>Boydston, J                                           | 10.1177/0739456X16657159       |
| 370 - EU Smart City Lighthouse Projects between Top-Down Strategies and Local Legitimation: The Case of Hamburg                                 | Lange, K<br>Knieling, J                                          | 10.17645/up.v5i1.2531          |
| 371 - Digital disruption and planning - use of data and digital technology by professional planners, and perceptions of change to planning work | Daniel, C<br>Pettit, C                                           | 10.1080/07293682.2021.1920995  |
| 372 - Citizen engagement body of knowledge? A fuzzy decision maker for index-term selection in built environment projects                       | Zarei, F<br>Nik-Bakht, M                                         | 10.1016/j.cities.2021.103137   |
| 373 - How Does ICT Expansion Drive "Smart" Urban Growth? A Case Study of Nanjing, China                                                         | Cai, ZP<br>Cvetkovic, V<br>Page, J                               | 10.17645/up.v5i1.2561          |
| 374 - Accelerating the development of smart city initiatives amidst the COVID-19 pandemic: the case of health code in China                     | Shi, L<br>Shi, C<br>Wu, X<br>Ma, L                               | 10.1080/17516234.2021.1902078  |
| 375 - Environmental Open Data in Urban Platforms: An Approach to the Big Data Life Cycle                                                        | Gessa, A<br>Sancha, P                                            | 10.1080/10630732.2019.1656934  |
| 376 - Measuring the extent to which Londoners are willing to pay for public art in their city                                                   | Tanguy, M<br>Kumar, V                                            | 10.1016/j.techfore.2018.11.016 |
| 377 - Decision Models and Group Decision Support Systems for Emergency Management and City Resilience                                           | Chen, YM<br>Zhao, XY<br>Rich, E<br>Luna-Reyes, LF                | 10.4018/IJEPR.2018040103       |
| 378 - Ultimate ICT Network in Turkey For Smart Cities                                                                                           | Ercoskun, OY                                                     | 10.14744/planlama.2016.27247   |
| 379 - The Cuckoo's Nest Approach for Co-Creating Business Ecosystems in Smart Cities                                                            | Artto, K<br>Kyro, R<br>Ahola, T<br>Peltokorpi, A<br>Sandqvist, K |                                |
| 380 - Smart Cities: The Metrics of Future Internet-Based Developments and Renewable Energies of Urban and Regional Innovation                   | Deakin, M<br>Reid, A<br>Mora, L                                  | 10.1080/10630732.2020.1868738  |
| 381 - Towards A Novel Model for Smart Sustainable City Planning and Development: A Scholarly Backcasting Approach                               | Bibri, SE<br>Krogstie, J                                         | 10.6531/JFS.201909_24(1).0004  |

|                                                                                                                                                                             |                                                                 |                                  |
|-----------------------------------------------------------------------------------------------------------------------------------------------------------------------------|-----------------------------------------------------------------|----------------------------------|
| 382 - Framework for Smart City Model Composition: Choice of Component Design Models and Risks                                                                               | Chun, SA<br>Kim, D<br>Cho, JS<br>Chuang, M<br>Shin, S<br>Jun, D | 10.4018/IJEPR.20210701.0a4       |
| 383 - Cross-sectoral process modelling for smart city development                                                                                                           | Dessari, A<br>Javidroozi, V                                     | 10.1108/BPMJ-05-2021-0333        |
| 384 - Smart city reporting: A bibliometric and structured literature review analysis to identify technological opportunities and challenges for sustainable development     | Secinaro, S<br>Brescia, V<br>Lanzalonga, F<br>Santoro, G        | 10.1016/j.jbusres.2022.05.032    |
| 385 - Smart cities financing system: An empirical modelling from the European context                                                                                       | Blanck, M<br>Ribeiro, JLD                                       | 10.1016/j.cities.2021.103268     |
| 386 - Trojans of ambiguity vs resilient regeneration: visual meaning in cities                                                                                              | De Kock, PM<br>Carta, S                                         | 10.5130/AJCEB.v20i2.6605         |
| 387 - Urban land uses and smart mobility                                                                                                                                    | Francini, M<br>Palermo, A<br>Viapiana, MF                       |                                  |
| 388 - The contribution of knowledge management to smart cities for innovation: Proposal for a prescriptive framework and a research agenda                                  | De Borba, D<br>Palacios, RA<br>Luciano, EM<br>Chaves, MS        | 10.5585/iji.v8i3.18543           |
| 389 - City profile: Kochi, city region-Planning measures to make Kochi smart and creative                                                                                   | Kuriakose, PN<br>Philip, S                                      | 10.1016/j.cities.2021.103307     |
| 390 - Citizen Awareness of the Smart City:A Study of khon kaen, Thailand                                                                                                    | Kamnuansilpa,P<br>Laochankham, S<br>Crompton, CD<br>Draper, J   | 10.13106/jafeb.2020.vol7.no7.497 |
| 391 - Coordinating sustainability, globalization and urban intelligence with the Habitat III and 2030-SDG agendas: the challenge of sustainable urban development in cities | Asprilla, HC                                                    | 10.25100/cdea.v36i66.8438        |
| 392 - Digital city: Paradigm of urban globalization                                                                                                                         | Benitez-Gutierrez, G                                            | 10.15446/bitacora.v27n1.51349    |
| 393 - Citizen empowerment and satisfaction with smart city app: Findings from Jakarta                                                                                       | Zhu, YQ<br>Alamsyah, N                                          | 10.1016/j.techfore.2021.121304   |
| 394 - An integrative study of the implications of the rise of coworking spaces in smart cities                                                                              | Zhao, F<br>Prentice, C<br>Wallis, J<br>Patel, A<br>Waxin, MF    | 10.9770/jesi.2020.8.2(28)        |
| 395 - Residency and service towards a standard for representing telecommunications and innovation open data                                                                 | Forde, AN<br>Fox, MS                                            |                                  |
| 396 - Rebranding a district: The Breidholt project in Reykjavik                                                                                                             | Wilkinson, C<br>Fumagalli, I<br>Rossetti, S                     | 10.6092/1970-9870/4004           |

|                                                                                                                              |                                                                                                 |                                |
|------------------------------------------------------------------------------------------------------------------------------|-------------------------------------------------------------------------------------------------|--------------------------------|
| 397 - World Heritage meets Smart City in an Urban-Educational Hackathon in Rauma                                             | Suominen, AH<br>Halvari, S<br>Jussila, J                                                        | 10.22215/timreview/1268        |
| 398 - Smart cities as hubs: Connect, collect and control city flows                                                          | Anthopoulos, LG<br>Pourzolfaghar, Z<br>Lemmer, K<br>Siebenlist, T<br>Niehaves, B<br>Nikolaou, I | 10.1016/j.cities.2022.103660   |
| 399 - The smartization of metropolitan cities: the case of Paris                                                             | Khelladi, I<br>Castellano, S<br>Kalisz, D                                                       | 10.1007/s11365-020-00691-w     |
| 400 - Capitalizing on the "Public Turn": New Possibilities for Citizens and Civil Servants in Smart City-Making              | Engelbert, K<br>Ersoy, A<br>Van Bueren, E<br>Van Zoonen, L                                      | 10.1080/10630732.2021.1963647  |
| 401 - Enhancing the diffusion of e-participation tools in smart cities                                                       | Kopackova, H<br>Komarkova, J<br>Horak, O                                                        | 10.1016/j.cities.2022.103640   |
| 402 - Centro direzionale of Naples a "smart" concept                                                                         | Canfora, F<br>Corbisiero, F                                                                     | 10.6092/1970-9870/2792         |
| 403 - Challenges for sustainable urban mobility in Barcelona                                                                 | Recasens-Alsina, M                                                                              | 10.37230/CyTET.2020.204.05     |
| 404 - Urban Digital Infrastructure, Smart Cityism, and Communication: Research Challenges for Urban E-Planning               | McQuire, S                                                                                      | 10.4018/IJEPR.20210701.0a1     |
| 405 - Policies of resilience in the new institutional process the case-studies of Palermo and Siracusa in the south of Italy | Trapani, F<br>Minozzi, L                                                                        | 10.6092/1970-9870/3651         |
| 406 - Smart cities and citizen engagement: Evidence from Twitter data analysis on Italian municipalities                     | Blasi, S<br>Gobbo, E<br>Sedita, SR                                                              | 10.1016/j.jum.2022.04.001      |
| 407 - Entrepreneurial ecosystem and well-being in European smart cities: a comparative perspective                           | Penco, L<br>Ivaldi, E<br>Ciacci, A                                                              | 10.1108/TQM-04-2021-0097       |
| 408 - Co-production in public management: a case study towards a smart city                                                  | Schreiner, T<br>Poleza, M<br>Da Costa, EM                                                       | 10.1504/IJKBD.2021.119046      |
| 409 - Quantifying the Spatio-Temporal Potential of Drive-by Sensing in Smart Cities                                          | Anjomshoaa, A<br>Santi, P<br>Duarte, F<br>Ratti, C                                              | 10.1080/10630732.2020.1791679  |
| 410 - Smart parking: an investigation of users' satisfaction in the Kingdom of Bahrain                                       | Al-Kaabi, R<br>Ali, H<br>Ahmed, S<br>Ahmed, K                                                   | 10.1504/IJSTM.2021.118174      |
| 411 - The structural model of indicators for evaluating the quality of urban smart living                                    | Shami, MR<br>Rad, VB<br>Moinifar, M                                                             | 10.1016/j.techfore.2021.121427 |
| 412 - Institutionalising smart city research and innovation: from fuzzy definitions to real-life experiments                 | Soe, RM<br>De Azambuja, LS<br>Toiskallio, K                                                     | 10.1080/17535069.2021.1998592  |

|                                                                                                                                    |                                                                                                |                                |
|------------------------------------------------------------------------------------------------------------------------------------|------------------------------------------------------------------------------------------------|--------------------------------|
|                                                                                                                                    | Nieminen, M<br>Batty, M                                                                        |                                |
| 413 - The Application of Internet of Things in Metering the Consumption of Utilities in the Czech Republic                         | Sladek, P<br>Maryska, M<br>Nedomova, L<br>Doucek, P                                            | 10.12776/QIP.V24I1.1308        |
| 414 - City-wide scale-up of smart city pilot projects: Governance conditions                                                       | Bundgaard, L<br>Borr, S                                                                        | 10.1016/j.techfore.2021.121014 |
| 415 - Allocation of Residential Areas in Smart Insular Communities: The Case of Mykonos, Greece                                    | Papadopoulou, CA<br>Hatzichristos, T                                                           | 10.4018/IJEPR.2020100103       |
| 416 - Planning cooperation between city government and ICT firms in the context of smart city concept                              | Glebocki, K                                                                                    | 10.17512/pjms.2021.24.1.07     |
| 417 - 'Nested' Disruptive Technologies for Smart Cities: Effects and Challenges                                                    | Krishnan, B<br>Arumugam, S<br>Maddulety, K                                                     | 10.1142/S0219877020300037      |
| 418 - Residents' Perceptions of a Smart Technology Retrofit Towards Nearly Zero-Energy Performance                                 | Mooses, V<br>Pastak, I<br>Kamenjuk, P<br>Poom, A                                               | 10.17645/up.v7i2.5020          |
| 419 - Mapping hybrid cities through location-based technologies: A systematic review of the literature                             | Tarachucky, L<br>Sabatini-Marques, J<br>Yigitcanlar, T<br>Baldessar, MK<br>Pancholi, S         | 10.1016/j.cities.2021.103296   |
| 420 - From Open Data to Smart City Governing Innovation in the Rennes Metropolitan Area (France)                                   | Le Breton, MA<br>Girardeau, M<br>Bailleul, H                                                   | 10.4018/IJEPR.20211001.0a2     |
| 421 - The urban governance of autonomous vehicles-In love with AVs or critical sustainability risks to future mobility transitions | Grindsted, TS<br>Christensen, TH<br>Freudendal-Pedersen, M<br>Friis, F<br>Hartmann-Petersen, K | 10.1016/j.cities.2021.103504   |
| 422 - The challenge of incorporating smart city activities in medium-size cities: the case of Greece                               | Coccosis, H<br>Delladetsimas, PM<br>Niavis, S                                                  | 10.1504/IJSTM.2017.088947      |
| 423 - Smart Cities: From Silos to Cross-Border Approach                                                                            | Soe, RM                                                                                        | 10.4018/IJEPR.2018040105       |
| 424 - Analysing the impact of smart city service quality on citizen engagement in a public emergency                               | Zhu, WL<br>Yan, RZ<br>Song, Y                                                                  | 10.1016/j.cities.2021.103439   |
| 425 - What drives consumers smart? The challenge of adoption of smart city solutions                                               | Malchenko, YA<br>Smirnova, MM                                                                  | 10.21638/spbu18.2019.305       |
| 426 - Raising Information Security Awareness in the Field of Urban and Regional Planning                                           | Scholl, MC                                                                                     | 10.4018/IJEPR.2019070104       |
| 427 - Open Strategy in a Smart City                                                                                                | Einola, S<br>Kohtamaki, M                                                                      | 10.22215/timreview/1267        |

|                                                                                                                                      |                                                                                                                         |                                |
|--------------------------------------------------------------------------------------------------------------------------------------|-------------------------------------------------------------------------------------------------------------------------|--------------------------------|
|                                                                                                                                      | Hietikko, H                                                                                                             |                                |
| 428 - Smart Sustainable Cities: Smart Approaches and Analysis                                                                        | Vukovic, NA<br>Larionova, VA<br>Morganti, P                                                                             | 10.17059/ekon.reg.2021-3-20    |
| 429 - Co-creation of the green smart city concept. Analysis of the maturity of municipalities in the Polish-German borderland region | Lazniewska, E<br>Janicka, I<br>Gorecki, T                                                                               | 10.6092/1970-9870/8116         |
| 430 - Highlighting smart city mirages in public perceptions: A Twitter sentiment analysis of four African smart city projects        | Arku, RN<br>Buttazzoni, A<br>Agyapon-Ntra, K<br>Bandauko, E                                                             | 10.1016/j.cities.2022.103857   |
| 431 - Identifying preferred smart city services for a major city in a developing country: the case of Bangkok                        | Yamsaengsung, S<br>Papasratorn, B                                                                                       | 10.1504/IJSTM.2017.10009862    |
| 432 - The Contribution of the Knowledge Society to the Eco Development and the Smart Cities                                          | Lehfeld, LD<br>Siqueira, ON                                                                                             |                                |
| 433 - The role of dynamic managerial capabilities and organizational readiness in smart city transformation                          | Guenduez, AA<br>Mergel, I                                                                                               | 10.1016/j.cities.2022.103791   |
| 434 - How to Humanize Technology in Smart Cities                                                                                     | Weinstein, Z                                                                                                            | 10.4018/IJEPR.2020070104       |
| 435 - LI-FI for a digital urban infrastructure. A novel technology for the smart city                                                | Iannucci, C<br>Pini, F                                                                                                  |                                |
| 436 - Municipal data governance: An analysis of Brazilian and European practices                                                     | Doned, DCM<br>Belli, L                                                                                                  |                                |
| 437 - An Integrated Methodology Model for Smart Mobility System Applied to Sustainable Tourism                                       | Amendola, C<br>La Bella, S<br>Joime, GP<br>Mascioli, FMF<br>Vito, P                                                     | 10.3390/admsci12010040         |
| 438 - Application of ICTs in the development of Sustainable Smart Cities                                                             | Palomo, ST                                                                                                              | 10.7200/esicm.168.0521.4       |
| 439 - Smart cities: Planning and extrafiscality                                                                                      | Ribas, LM<br>De Carli, FG                                                                                               | 10.12957/rdc.2022.46220        |
| 440 - Advertising-Cities Face to Smart-Cities: The Trends of Integration Policies for Information New Technologies in Madrid         | Jacomo, L                                                                                                               | 10.4018/IJEPR.2018070102       |
| 441 - Assessment of Tendency to Become a Smart City Among Turkish Cities in the Context of Underdevelopment: An Empirical Analysis   | Tuysuz, S<br>Yazar, A<br>Manga, M                                                                                       | 10.14744/planlama.2021.01346   |
| 442 - AI-enabled digital forgery analysis and crucial interactions monitoring in smart communities                                   | Seddik, A<br>Maleh, Y<br>El Banby, GM<br>Khalaf, AAM<br>Abd El-Samie, FE<br>Gupta, BB<br>Psannis, K<br>Abd El-Latif, AA | 10.1016/j.techfore.2022.121555 |

|                                                                                                                       |                                                                                                                |                                    |
|-----------------------------------------------------------------------------------------------------------------------|----------------------------------------------------------------------------------------------------------------|------------------------------------|
| 443 - Blockchain technologies in smart cities: A proposal for autopoietic smart cities                                | Migliorini, IB<br>Guevara, AD<br>Dib, VC<br>Conti, DD                                                          | 10.23925/2179-3565.2021v12i4p04-12 |
| 444 - Building Smart Cities in China: Problems and Countermeasures                                                    | Cong, XN<br>Liu, ZY                                                                                            | 10.1142/S2345748116500226          |
| 445 - Sense and the city: An Emotion Data Framework for smart city governance                                         | Willis, KS<br>Nold, C                                                                                          | 10.1016/j.jum.2022.05.009          |
| 446 - Examining the Role of Principal Contributors to 'Sectoral Carbon Emissions': In the Indian Context              | Jain, M<br>Nagpal, A                                                                                           | 10.1177/0972262919898096           |
| 447 - Crowd-based open innovation in Telco Operators: Readiness assessment for smart city service development         | Sariz, Z<br>Obradovic, V<br>Bogdanovic, Z<br>Labus, A<br>Mitrovic, S                                           | 10.5937/sjm17-36913                |
| 448 - Digital (un)sustainability at an urban university in Sydney, Australia                                          | McLean, J<br>Maalsen, S<br>Lake, L                                                                             | 10.1016/j.cities.2022.103746       |
| 449 - Smart city: A critical assessment of the concept and its implementation in Romanian urban strategies            | Ibanescu, BC<br>Pascariu, GC<br>Banica, A<br>Bejenaru, I                                                       | 10.1016/j.jum.2022.05.003          |
| 450 - Understanding the Contemporary Cities as Organizational Structures. A Contribution to the Category 'Smart City' | Jimenez, JM<br>Ramirez, SQ                                                                                     | 10.11144/Javeriana.cvu13.ccce      |
| 451 - Analysis of smart city global research trends with network map technique                                        | Kemec, A                                                                                                       |                                    |
| 452 - Living labs: Challenging and changing the smart city power relations?                                           | Nguyen, HT<br>Marques, P<br>Benneworth, P                                                                      | 10.1016/j.techfore.2022.121866     |
| 453 - Situated, Yet Silent: Data Relations in Smart Street Furniture                                                  | Gangneux, J<br>Joss, S<br>Humphry, J<br>Hanchard, M<br>Chesher, C<br>Maalsen, S<br>Merrington, P<br>Wessels, B | 10.1080/10630732.2022.2036311      |
| 454 - Artificial intelligence, institutions, and resilience: Prospects and provocations for cities                    | Schintler, LA<br>McNeely, CL                                                                                   | 10.1016/j.jum.2022.05.004          |
| 455 - Smart city place-based outcomes in India: bubble urbanism and socio-spatial fragmentation                       | Prasad, D<br>Alizadeh, T<br>Dowling, R                                                                         | 10.1080/13574809.2021.2022978      |
| 456 - Recent developments in smart city assessment: A bibliometric and content analysis-based literature review       | Hajek, P<br>Youssef, A<br>Hajkova, V                                                                           | 10.1016/j.cities.2022.103709       |
| 457 - Social mobile marketing evolution of communication strategies in the web 2.0 era                                | Franco, S                                                                                                      | 10.6092/1970-98702431              |

|                                                                                                                                                    |                                                                                          |                                |
|----------------------------------------------------------------------------------------------------------------------------------------------------|------------------------------------------------------------------------------------------|--------------------------------|
| 458 - From Citizens to Decision-Makers: A Natural Language Processing Approach in Citizens' Participation                                          | Boukchina, E<br>Mellouli, S<br>Menif, E                                                  | 10.4018/IJEPR.2018040102       |
| 459 - Politiche "SMART" e visione metropolitana                                                                                                    | Fini, G<br>Caschetto, S                                                                  | 10.6092/1970-9870/2812         |
| 460 - Urban regeneration in the UE through the reciprocal relationship between greenfield FDI and smart cities                                     | De Falco, S                                                                              | 10.6092/2281-4574/5313         |
| 461 - The smart city transport and logistics system: Theory, methodology and practice                                                              | Savin, GV                                                                                | 10.29141/2218-5003-2021-12-6-5 |
| 462 - Assessing and building municipal open data capability                                                                                        | Habib, A<br>Prybutok, VR<br>Philpot, D                                                   | 10.1007/s10257-021-00539-y     |
| 463 - Lessons from Harvey: Improving traditional damage estimates with social media sourced damage estimates                                       | Villegas, CA<br>Martinez, MJ                                                             | 10.1016/j.cities.2021.103500   |
| 464 - Multi-criteria decision-making models for smart city ranking: Evidence from the Pearl River Delta region, China                              | Ye, F<br>Chen, YY<br>Li, LX<br>Li, YA<br>Yi, Y                                           | 10.1016/j.cities.2022.103793   |
| 465 - Planning First, Tools Second: Evaluating the Evolving Roles of Planning Support Systems in Urban Planning                                    | Jiang, HX<br>Geertman, S<br>Witte, P                                                     | 10.1080/10630732.2022.2047395  |
| 466 - Smart city, metropolitan areas and competitiveness. The case study of Florence                                                               | Gargiulo, C<br>Tremittara, MR                                                            | 10.6092/1970-9870/3010         |
| 467 - Smartization in Gatchina: A Case of a Russian Town                                                                                           | Vorobeva, OV<br>Manzhula, EA                                                             | 10.4018/IJEPR.20211001.0a5     |
| 468 - Towards the creation of a searchable 3D smart city model                                                                                     | Lafioune, N<br>St-Jacques, M                                                             | 10.1108/INMR-03-2019-0033      |
| 469 - Intelligent transport systems in Turkish urban environments: a comprehensive review                                                          | Biyik, C<br>Yigitcanlar, T                                                               |                                |
| 470 - Integrating community value into the adoption framework: A systematic review of conceptual research on participatory smart city applications | Marimuthu, M<br>D'Souza, C<br>Shukla, Y                                                  | 10.1016/j.techfore.2022.121779 |
| 471 - Leading smart city projects: Government dynamic capabilities and public value creation                                                       | Barrutia, JM<br>Echebarria, C<br>Aguado-Moralejo, I<br>Apaolaza-Ibanez, V<br>Hartmann, P | 10.1016/j.techfore.2022.121679 |
| 472 - Perception of ICT use by residents of smart cities                                                                                           | Lesjak, B<br>Psenica, I                                                                  |                                |
| 473 - Co-owned resources: IP and data in smart cities                                                                                              | Toli, AM<br>Murtagh, N<br>Smyth, H                                                       | 10.1108/JSTP-11-2019-0243      |
| 474 - Conceptualising the Use of Digital Technologies in Spatial Planning: A Progress Report on Innovation in Britain                              | Goodchild, B                                                                             | 10.4018/IJEPR.2020070101       |

---

475 - The Sentiments of Indonesian Urban  
Citizens Regarding the Lockdown-Like  
Policy During the COVID-19 Pandemic: A  
Path Towards an Urban E-Planning Pro-  
cess in a Pandemic Situation INTRODUC-  
TION

---

Putra, ZDW

10.4018/IJEPR.297515
