# Supplementary material for: A Bibliometric Analysis on Smart Cities Related to Land Use
Source: MDPI journal article supplement (doi:10.3390/land11122132), 2022-11-26
Supplement: s1 [file s1]

**Table S2.** VOSviewer thesaurus file Initial Period.

|    | <b>LABEL</b>                                  | <b>REPLACE BY</b>                           |
|----|-----------------------------------------------|---------------------------------------------|
| 1  | cities                                        | City                                        |
| 2  | definitions                                   | Definition                                  |
| 3  | eco-cities                                    | eco-city                                    |
| 4  | Ict                                           | information and communication<br>technology |
| 5  | Icts                                          | information and communication<br>technology |
| 6  | information and communication<br>technologies | information and communication<br>technology |
| 7  | policies                                      | Policy                                      |
| 8  | public-participation                          | public participation                        |
| 9  | public-private partnerships                   | public-private partnership                  |
| 10 | public-private-people partnerships            | public-private partnership                  |
| 11 | smart cities                                  | smart city                                  |
| 12 | smart specialisation                          | smart specialization                        |
| 13 | spaces                                        | Space                                       |
| 14 | stakeholders                                  | Stakeholder                                 |
| 15 | technologies                                  | Technology                                  |
| 16 | triple-helix                                  | triple helix                                |
| 17 | urban-development                             | urban development                           |
