# Supplementary material for: A Bibliometric Analysis on Smart Cities Related to Land Use
Source: MDPI journal article supplement (doi:10.3390/land11122132), 2022-11-26
Supplement: s1 [file s1]

**Table S4.** Example of VOSviewer thesaurus file Development Period.

|    | <b>LABEL</b>            | <b>REPLACE BY</b>       |
|----|-------------------------|-------------------------|
| 1  | challenges              | Challenge               |
| 2  | citizens' participation | citizen participation   |
| 3  | eco-cities              | eco-city                |
| 4  | e-governance            | e-government            |
| 5  | government              | Governance              |
| 6  | infostructures          | Infrastructure          |
| 7  | Iot                     | internet of things      |
| 8  | mobile phones           | Smartphones             |
| 9  | urban innovations       | urban innovation        |
| 10 | vehicle-routing problem | vehicle routing problem |
