# Supplementary material for: A Bibliometric Analysis on Smart Cities Related to Land Use
Source: MDPI journal article supplement (doi:10.3390/land11122132), 2022-11-26
Supplement: s1 [file s1]

**Table S5.** The most frequent keywords.

|    | <b>Keyword</b>          | <b>Occurrences</b> | <b>Total link strength</b> |
|----|-------------------------|--------------------|----------------------------|
| 1  | smart city              | 91                 | 187                        |
| 2  | city                    | 49                 | 134                        |
| 3  | governance              | 11                 | 40                         |
| 4  | innovation              | 11                 | 38                         |
| 5  | framework               | 9                  | 37                         |
| 6  | management              | 10                 | 36                         |
| 7  | technology              | 10                 | 34                         |
| 8  | sustainable development | 13                 | 33                         |
| 9  | challenge               | 9                  | 32                         |
| 10 | model                   | 9                  | 31                         |
