# Supplementary material for: A Bibliometric Analysis on Smart Cities Related to Land Use
Source: MDPI journal article supplement (doi:10.3390/land11122132), 2022-11-26
Supplement: s1 [file s1]

**Table S7.** The most frequent keywords.

|    | <b>Keyword</b> | <b>Occurrences</b> | <b>Total link strength</b> |
|----|----------------|--------------------|----------------------------|
| 1  | smart city     | 274                | 1,045                      |
| 2  | City           | 145                | 700                        |
| 3  | Innovation     | 54                 | 296                        |
| 4  | big data       | 45                 | 261                        |
| 5  | Governance     | 48                 | 250                        |
| 6  | Technology     | 34                 | 222                        |
| 7  | Internet       | 30                 | 187                        |
| 8  | Model          | 29                 | 174                        |
| 9  | Framework      | 26                 | 161                        |
| 10 | management     | 24                 | 160                        |
